# Supplementary material for: Comparative Analysis of Gene Content Evolution in Phytoplasmas and Mycoplasmas
Source: PLoS One. 2012 Mar 27;7(3):e34407. doi: 10.1371/journal.pone.0034407 (PMC3313985; doi:10.1371/journal.pone.0034407)
Supplement: Table S1 — Complete list of the 10,508 homologous gene clusters. (XLS) [file pone.0034407.s001.xls]

## Sheet: All_Clusters
Cluster	Genome	Protein_id	Gene	Product
0	Mmyc	NP_975049	tnp	IS1634BT transposase
0	Mmyc	NP_975071	tnp	IS1634BK transposase
0	Mmyc	NP_975081	tnp	IS1634BA transposase
0	Mmyc	NP_975084	tnp	IS1634BV transposase
0	Mmyc	NP_975107	tnp	IS1634BO transposase
0	Mmyc	NP_975108	tnp	IS1634AP transposase
0	Mmyc	NP_975171	tnp	IS1634BZ transposase
0	Mmyc	NP_975175	tnp	IS1634BP transposase
0	Mmyc	NP_975244	tnp	IS1634AC transposase
0	Mmyc	NP_975248	tnp	IS1634AG transposase
0	Mmyc	NP_975330	tnp	IS1634AW transposase
0	Mmyc	NP_975337	tnp	IS1634BR transposase
0	Mmyc	NP_975358	tnp	IS1634AE transposase
0	Mmyc	NP_975506	tnp	IS1634AD transposase
0	Mmyc	NP_975522	tnp	IS1634AB transposase
0	Mmyc	NP_975535	tnp	IS1634AA transposase
0	Mmyc	NP_975583	tnp	IS1634CA transposase
0	Mmyc	NP_975585	tnp	IS1634BH transposase
0	Mmyc	NP_975650	tnp	IS1634AS transposase
0	Mmyc	NP_975662	tnp	IS1634BL transposase
0	Mmyc	NP_975674	tnp	IS1634BM transposase
0	Mmyc	NP_975761	tnp	IS1634AM transposase
0	Mmyc	NP_975771	tnp	IS1634AU transposase
0	Mmyc	NP_975776	tnp	IS1634AY transposase
0	Mmyc	NP_975787	tnp	IS1634CHBZ transposase
0	Mmyc	NP_975795	tnp	IS1634CI transposase
0	Mmyc	NP_975829	tnp	IS1634AL transposase
0	Mmyc	NP_975832	tnp	IS1634AX transposase
0	Mmyc	NP_975841	tnp	IS1634CE transposase
0	Mmyc	NP_975846	tnp	IS1634AZ transposase
0	Mmyc	NP_975889	tnp	IS1634CD transposase
0	Mmyc	NP_975901	tnp	IS1634BY transposase
0	Mmyc	NP_975936	tnp	IS1634BQ transposase
0	Mmyc	NP_975943	tnp	IS1634BN transposase
0	Mmyc	NP_975948	tnp	IS1634AV transposase
0	Mmyc	NP_975956	tnp	IS1634CB transposase
0	Mmyc	NP_975968	tnp	IS1634BG transposase
0	Mmyc	NP_975975	tnp	IS1634BX transposase
0	Mmyc	NP_975998	tnp	IS1634CM transposase
0	Pthe	YP_001210699	NA	transposase
0	Pthe	YP_001212144	NA	transposase
0	Pthe	YP_001213076	NA	hypothetical protein
1	Bsub	NP_389319	yknY	ABC transporter ATP-binding protein
1	Bsub	NP_390916	bceA	bacitracin ABC efflux transporter ATP-binding protein
1	Bsub	NP_390920	ytrE	ABC transporter ATP-binding protein
1	Bsub	NP_391208	yvrO	ABC transporter ATP-binding protein
1	Bsub	NP_391350	yvcR	ABC transporter ATP-binding protein
1	Bsub	NP_391843	yxdL	cationic peptides ABC transporter ATP-binding protein
1	CaPastA	YP_456331	phnL	ABC transporter ATP-binding protein
1	CaPastA	YP_456815	phnL	ABC-type transport system, ATPase component
1	CaPastO	NP_950348	phnL	ABC-type transport system, involved in lipoprotein release, ATPase component
1	CaPastO	NP_950851	phnL	ABC transporter, ATPase component
1	CaPaus	YP_001799115	phnL	ABC transporter, ATPase component
1	CaPmal	YP_002004055	phnL	ABC transporter, ATPase component
1	CaPmal	YP_002004141	phnL	ABC transporter, ATPase component
1	CaPmal	YP_002004511	phnL	ABC transporter, ATPase component
1	Cklu	YP_001393766	NA	ABC transporter ATPase
1	Cklu	YP_001393795	NA	ABC transporter ATPase
1	Cklu	YP_001395035	NA	ABC transporter ATPase
1	Cklu	YP_001395051	NA	ABC transporter ATPase
1	Cklu	YP_001395674	NA	ABC transporter ATPase
1	Cklu	YP_001395742	NA	ABC transporter ATPase
1	Cklu	YP_001395994	NA	ABC transporter ATPase
1	Cklu	YP_001396421	NA	ABC transporter ATPase
1	Cklu	YP_001396766	NA	hypothetical protein
1	Cklu	YP_001396904	NA	ABC transporter ATPase
1	Cklu	YP_001396914	NA	ABC transporter ATPase
1	Lpla	NP_785017	NA	ABC transporter, ATP-binding and permease protein
1	Lpla	NP_785940	NA	ABC transporter, ATP-binding and permease protein
1	Lpla	NP_786123	NA	ABC transporter, ATP-binding protein
1	Lpla	NP_786191	NA	ABC transporter, ATP-binding protein
1	Lpla	NP_786322	NA	ABC transporter, ATP-binding and permease protein
1	Maga	YP_003516010	NA	ABC transporter ATP-binding protein
1	Mgen	NP_072727	NA	ABC transporter ATP-binding protein
1	Mgen	NP_073137	NA	ABC transporter ATP-binding protein
1	Mgen	NP_073139	NA	ABC transporter ATP-binding protein
1	Mmyc	NP_975041	abc	ABC transporter ATP-binding protein
1	Pthe	YP_001210588	SalX	peptide ABC transporter ATPase
1	Pthe	YP_001210964	SalX	peptide ABC transporter ATPase
1	Pthe	YP_001212007	SalX	peptide ABC transporter ATPase
2	CaPastA	YP_456371	tra5	Tra5 transposase
2	CaPastA	YP_456483	tra5	Tra5 transposase
2	CaPastA	YP_456485	tra5	Tra5 transposase
2	CaPastO	NP_950589	tra5	putative transposase
2	CaPastO	NP_950799	tra5	putative transposase
2	CaPastO	NP_950819	tra5	putative transposase
2	CaPastO	NP_950826	tra5	putative transposase
2	CaPastO	NP_950894	tra5	putative transposase
2	CaPaus	YP_001798754	NA	Putative phage integrase
2	CaPaus	YP_001798876	NA	Putative phage integrase
2	CaPaus	YP_001799000	NA	Putative phage integrase
2	CaPaus	YP_001799352	NA	Putative phage integrase
2	Cklu	YP_001396818	NA	transposase
2	Lpla	NP_784877	NA	transposase
2	Mmyc	NP_975026	tnpB	IS1296SQ transposase protein B
2	Mmyc	NP_975066	tnpB	IS1296IE transposase protein B
2	Mmyc	NP_975142	tnpB	IS1296MP transposase protein B
2	Mmyc	NP_975177	tnpB	IS1296UK transposase protein B
2	Mmyc	NP_975214	tnpB	IS1296JI transposase protein B
2	Mmyc	NP_975239	tnpB	IS1296FJ transposase protein B
2	Mmyc	NP_975245	tnpB	IS1296OD transposase protein B
2	Mmyc	NP_975609	tnpB	IS1296LL transposase protein B
2	Mmyc	NP_975642	tnpB	IS1296AB_B transposase protein B
2	Mmyc	NP_975815	tnpB	IS1296HV transposase protein B
2	Mmyc	NP_975868	tnpB	IS1296AC_R transposase protein B
2	Mmyc	NP_975873	tnpB	IS1296DS transposase protein B
3	Bsub	NP_388212	nasD	assimilatory nitrite reductase subunit
3	Bsub	NP_388214	nasB	assimilatory nitrate reductase electron transfer subunit
3	CaPastA	YP_456520	hcaD	NADH oxidase H2O2-forming
3	CaPastO	NP_950693	hcaD	uncharacterized NAD-dependent dehydrogenase
3	CaPaus	YP_001799391	nox	Putative NADH oxidase H2O2-forming
3	CaPmal	YP_002004321	hcaD	NAD-dependent dehydrogenase
3	Cklu	YP_001393834	NA	CoA-disulfide reductase-related protein
3	Lpla	NP_784510	nox1	NADH oxidase
3	Lpla	NP_784516	nox2	NADH oxidase
3	Lpla	NP_785464	nox3	NADH oxidase (putative)
3	Lpla	NP_785479	nox4	NADH oxidase
3	Lpla	NP_786664	nox5	NADH oxidase
3	Maga	YP_003515435	nox	NADH oxidase
3	Maga	YP_003515448	nox	NADH oxidase
3	Mgen	NP_072942	nox	NADH oxidase
3	Mmob	YP_016317	nox	NADH oxidase
3	Mmyc	NP_975262	nox	NADH oxidase
3	Mmyc	NP_975983	nox	NADH oxidase
3	Mmyc	NP_976006	nox	NADH oxidase
3	Pthe	YP_001211714	HcaD	NAD(FAD)-dependent dehydrogenases and rhodanese-like sulfurtransferase
3	Pthe	YP_001212056	NirB	NAD(P)H-nitrite reductase
3	Pthe	YP_001212284	NA	NAD(FAD)-dependent dehydrogenases
4	Bsub	NP_391442	lytC	N-acetylmuramoyl-L-alanine amidase
4	Cklu	YP_001393921	NA	surface-layer protein
4	Cklu	YP_001394447	NA	hypothetical protein
4	Cklu	YP_001394448	NA	hypothetical protein
4	Cklu	YP_001394449	NA	hypothetical protein
4	Cklu	YP_001394473	NA	surface-layer protein
4	Cklu	YP_001394490	NA	surface-layer protein
4	Cklu	YP_001394491	NA	surface-layer protein
4	Cklu	YP_001394713	NA	hypothetical protein
4	Cklu	YP_001395089	NA	hypothetical protein
4	Cklu	YP_001395463	NA	hypothetical protein
4	Cklu	YP_001395621	NA	hypothetical protein
4	Cklu	YP_001395622	NA	hypothetical protein
4	Cklu	YP_001396112	NA	hypothetical protein
4	Cklu	YP_001396259	NA	cell wall binding protein
4	Cklu	YP_001396313	NA	surface-layer protein
4	Cklu	YP_001396452	NA	hypothetical protein
4	Cklu	YP_001396453	NA	surface-layer protein
4	Cklu	YP_001396486	NA	hypothetical protein
4	Cklu	YP_001396487	NA	hypothetical protein
4	Cklu	YP_001397092	NA	hypothetical protein
4	Pthe	YP_001213355	NA	hypothetical protein
5	Bsub	NP_388168	adcC	Zn(II) transporter ATP-binding protein
5	Bsub	NP_388264	yclP	iron-siderophore ABC transporter ATP-binding protein
5	Bsub	NP_390954	mntB	manganese ABC transporter ATP-binding protein
5	CaPastA	YP_456819	mntA	ABC-type Mn/Zn transport system, ATP-binding protein
5	CaPastO	NP_950345	znuC	ABC-type Mn/Zn transport system, ATPase component
5	CaPaus	YP_001799068	znuC	ABC-type Zn/Mn transport system, ATPase component
5	CaPmal	YP_002004047	znuC	ABC-type Mn/Zn transport system, ATPase component
5	CaPmal	YP_002004519	znuC	ABC-type Mn/Zn transport system, ATPase component
5	Cklu	YP_001395097	NA	ABC transporter ATPase
5	Cklu	YP_001395890	NA	ABC transporter ATP-binding protein
5	Cklu	YP_001396287	NA	metal ABC transporter, ATPase component
5	Lpla	NP_784254	NA	zinc/iron ABC transporter, ATP-binding protein
5	Lpla	NP_784778	mtsC	manganese ABC transporter, ATP-binding protein
5	Lpla	NP_785083	fecE	iron chelatin ABC transporter, ATP-binding protein
5	Maga	YP_003515455	phnC	ABC transporter ATP-binding protein
5	Mgen	NP_072956	NA	phosphonate ABC transporter ATP-binding protein
5	Mmyc	NP_975763	phnC	alkylphosphonate ABC transporter, ATP-binding component
5	Mmyc	NP_975777	phnC	alkylphosphonate ABC transporter, ATP-binding component
5	Pthe	YP_001211931	ZnuC	ABC-type Mn/Zn transport systems, ATPase component
6	Bsub	NP_387887	gyrB	DNA gyrase subunit B
6	Bsub	NP_389691	parE	DNA topoisomerase IV subunit B
6	CaPastA	YP_456451	gyrB	DNA gyrase subunit B
6	CaPastO	NP_950750	gyrB	DNA gyrase beta subunit
6	CaPaus	YP_001798879	gyrB	DNA gyrase beta subunit
6	CaPmal	YP_002004232	gyrB	DNA gyrase, beta subunit
6	Cklu	YP_001393441	gyrB	DNA gyrase subunit B
6	Lpla	NP_783871	gyrB	DNA gyrase, B subunit
6	Lpla	NP_785393	parE	DNA topoisomerase IV subunit B
6	Maga	YP_003515369	parE	topoisomerase IV subunit B
6	Maga	YP_003516004	gyrB	DNA gyrase subunit B
6	Mgen	NP_072663	gyrB	DNA gyrase subunit B
6	Mgen	NP_072865	parE	DNA topoisomerase IV, B subunit
6	Mmob	YP_015798	gyrB	DNA gyrase subunit b
6	Mmob	YP_016083	parE	topoisomerase IB subunit B
6	Mmyc	NP_975017	gyrB	DNA gyrase subunit B
6	Mmyc	NP_975496	parE	DNA topoisomerase IV subunit B
6	Pthe	YP_001210555	GyrB	type IIA topoisomerase, B subunit
7	Bsub	NP_387888	gyrA	DNA gyrase subunit A
7	Bsub	NP_389692	parC	DNA topoisomerase IV subunit A
7	CaPastA	YP_456450	gyrA	DNA gyrase subunit A
7	CaPastO	NP_950751	gyrA	DNA gyrase alpha subunit
7	CaPaus	YP_001798880	gyrA	DNA gyrase alpha subunit
7	CaPmal	YP_002004233	gyrA	DNA gyrase, alpha subunit
7	Cklu	YP_001393442	gyrA1	DNA gyrase subunit A
7	Lpla	NP_783872	gyrA	DNA gyrase, A subunit
7	Lpla	NP_785392	parC	DNA topoisomerase IV subunit A
7	Maga	YP_003515370	parC	topoisomerase IV subunit A
7	Maga	YP_003515787	gyrA	DNA gyrase subunit A
7	Mgen	NP_072664	gyrA	DNA gyrase subunit A
7	Mgen	NP_072866	parC	DNA topoisomerase IV, A subunit
7	Mmob	YP_016157	parC	DNA topoisomerase IV subunit A
7	Mmob	YP_016191	gyrA	DNA gyrase subunit A
7	Mmyc	NP_975018	gyrA	DNA gyrase subunit A
7	Mmyc	NP_975497	parC	topoisomerase IV subunit A
7	Pthe	YP_001210558	GyrA	type IIA topoisomerase, A subunit
8	Bsub	NP_389022	appC	oligopeptide ABC transporter permease
8	Bsub	NP_389027	oppC	oligopeptide ABC transporter permease
8	Bsub	NP_389177	dppC	dipeptide ABC transporter permease
8	CaPastA	YP_456727	dppC	ABC-type dipeptide transport system, permease protein DppC
8	CaPastO	NP_950275	NA	hypothetical protein
8	CaPastO	NP_950441	dppC	ABC-type dipeptide/oligopeptide system, permease component
8	CaPaus	YP_001799319	NA	ABC-type peptide/nickel transport system permease protein
8	CaPmal	YP_002004106	dppC	ABC-type dipeptide transport system, permease protein
8	Cklu	YP_001394441	oppC	hypothetical protein
8	Cklu	YP_001394703	NA	hypothetical protein
8	Lpla	NP_784921	oppC	oligopeptide ABC transporter, permease protein
8	Maga	YP_003515229	oppC	oligopeptide ABC transporter permease
8	Maga	YP_003515300	oppC	oligopeptide ABC transporter permease
8	Mgen	NP_072740	oppC	peptide ABC transporter permease
8	Mmob	YP_016147	oppC	oligopeptide ABC transporter permease protein
8	Mmyc	NP_975184	oppC	oligopeptide ABC transporter, permease component I
8	Mmyc	NP_975933	oppC	oligopeptide ABC transporter, permease component
8	Pthe	YP_001212036	DppC	ABC-type dipeptide/oligopeptide/nickel transport systems, permease components
9	Bsub	NP_389018	appD	oligopeptide ABC transporter ATP-binding protein
9	Bsub	NP_389028	oppD	oligopeptide ABC transporter ATP-binding protein
9	Bsub	NP_389178	dppD	dipeptide ABC transporter ATP-binding protein
9	CaPastA	YP_456724	dppD	dipeptide transport ATP-binding protein DppD
9	CaPastO	NP_950277	dppD	ABC-type dipeptide/oligopeptide transport system, ATPase component
9	CaPastO	NP_950444	dppD	ABC-type dipeptide/oligopeptide transport system, ATPase component
9	CaPaus	YP_001799315	NA	ABC-type peptide/nickel transport system ATP-binding protein
9	CaPmal	YP_002004104	dppD	ABC-type dipeptide/oligopeptide transport system, ATPase component
9	Cklu	YP_001394442	oppD	OppD
9	Cklu	YP_001394704	NA	hypothetical protein
9	Lpla	NP_784922	oppD	oligopeptide ABC transporter, ATP-binding protein
9	Maga	YP_003515228	oppD	oligopeptide ABC transporter ATP-binding protein
9	Maga	YP_003515301	oppD	oligopeptide ABC transporter ATP binding protein
9	Mgen	NP_072741	oppD	peptide ABC transporter ATP-binding protein
9	Mmob	YP_016146	pgk	phosphoglycerate kinase/ATPase domain-containing protein
9	Mmyc	NP_975185	oppD	oligopeptide ABC transporter, ATP-binding component
9	Mmyc	NP_975934	oppD	oligopeptide ABC transporter, ATP-binding component
9	Pthe	YP_001212035	NA	ATPase components of various ABC-type transport systems, contain duplicated ATPase
10	Bsub	NP_388230	srfAA	surfactin synthetase
10	Bsub	NP_388231	srfAB	surfactin synthetase
10	Bsub	NP_388233	srfAC	surfactin synthetase
10	Bsub	NP_389598	pksJ	polyketide synthase of type I
10	Bsub	NP_389600	pksL	polyketide synthase of type I
10	Bsub	NP_389601	pksM	polyketide synthase
10	Bsub	NP_389602	pksN	polyketide synthase of type I
10	Bsub	NP_389604	pksR	polyketide synthase
10	Bsub	NP_389712	ppsE	plipastatin synthetase
10	Bsub	NP_389713	ppsD	plipastatin synthetase
10	Bsub	NP_389714	ppsC	plipastatin synthetase
10	Bsub	NP_389715	ppsB	plipastatin synthetase
10	Bsub	NP_389716	ppsA	plipastatin synthetase
10	Bsub	NP_391076	dhbF	siderophore 2,3-dihydroxybenzoate-glycine-threonine trimeric ester bacillibactin synthetase
10	Cklu	YP_001395121	NA	polyketide synthase
10	Cklu	YP_001395123	NA	hybrid nonribosomal peptide synthetase/polyketide synthase
10	Cklu	YP_001395738	NA	hybrid nonribosomal peptide synthetase/polyketide synthase
10	Lpla	NP_784351	npsA	non-ribosomal peptide synthetase NpsA
11	CaPastA	YP_456387	NA	hypothetical protein
11	CaPastA	YP_456469	NA	hypothetical protein
11	CaPastO	NP_950785	NA	hypothetical protein
11	CaPastO	NP_950949	NA	hypothetical protein
11	CaPaus	YP_001798744	NA	hypothetical protein
11	CaPaus	YP_001798871	NA	hypothetical protein
11	CaPaus	YP_001798899	NA	hypothetical protein
11	CaPaus	YP_001798906	NA	hypothetical protein
11	CaPaus	YP_001798957	NA	hypothetical protein
11	CaPaus	YP_001798961	NA	hypothetical protein
11	CaPaus	YP_001798995	NA	hypothetical protein
11	CaPaus	YP_001799005	NA	hypothetical protein
11	CaPaus	YP_001799009	NA	hypothetical protein
11	CaPaus	YP_001799026	NA	hypothetical protein
11	CaPaus	YP_001799039	NA	hypothetical protein
11	CaPaus	YP_001799309	NA	hypothetical protein
11	CaPaus	YP_001799357	NA	hypothetical protein
12	Bsub	NP_389021	appB	oligopeptide ABC transporter permease
12	Bsub	NP_389026	oppB	oligopeptide ABC transporter permease
12	Bsub	NP_389176	dppB	dipeptide ABC transporter permease
12	CaPastA	YP_456726	dppB	ABC-type dipeptide transport system, permease protein DppB
12	CaPastO	NP_950442	dppB	ABC-type dipeptide/oligopeptide transport system, permease component
12	CaPaus	YP_001799318	NA	ABC-type peptide/nickel transport system permease protein
12	CaPmal	YP_002004107	dppB	ABC-type dipeptide/oligopeptide transport system, permease component
12	Cklu	YP_001394440	oppB	hypothetical protein
12	Cklu	YP_001394702	NA	hypothetical protein
12	Lpla	NP_784920	oppB	oligopeptide ABC transporter, permease protein
12	Maga	YP_003515230	oppB	oligopeptide ABC transporter permease
12	Maga	YP_003515299	oppB	oligopeptide ABC transporter permease
12	Mgen	NP_072739	oppB	peptide ABC transporter permease
12	Mmob	YP_016148	oppB	oligopeptide ABC transporter permease protein
12	Mmyc	NP_975932	oppB	oligopeptide ABC transporter, permease component
12	Pthe	YP_001212037	DppB	ABC-type dipeptide/oligopeptide/nickel transport systems, permease components
13	Cklu	YP_001393772	anfD	AnfD
13	Cklu	YP_001393929	NA	nitrogenase molybdenum-iron protein
13	Cklu	YP_001394226	nifD1	hypothetical protein
13	Cklu	YP_001394424	nifD2	hypothetical protein
13	Cklu	YP_001394432	nifD3	NifD3
13	Cklu	YP_001394433	nifD4	NifD4
13	Cklu	YP_001394436	nifD5	NifD5
13	Cklu	YP_001394437	nifD6	NifD6
13	Cklu	YP_001395134	vnfE	VnfE
13	Cklu	YP_001395137	vnfD	VnfD
13	Cklu	YP_001396163	nifD7	NifD7
13	Cklu	YP_001396164	nifD8	NifD8
13	Cklu	YP_001396169	nifD9	NifD9
13	Cklu	YP_001396455	nifE3	nitrogenase molybdenum-cofactor biosynthesis protein NifE
13	Cklu	YP_001396457	nifD10	NifD10
13	Cklu	YP_001397032	NA	nitrogenase iron-molybdenum protein, alpha chain
14	Mmob	YP_015795	mvspA	variable surface protein mvspA
14	Mmob	YP_016019	mvspB	variable surface protein mvspB
14	Mmob	YP_016020	mvspC	variable surface protein mvspC
14	Mmob	YP_016025	mvspD	variable surface protein mvspD
14	Mmob	YP_016026	mvspE	variable surface protein mvspE
14	Mmob	YP_016027	mvspF	variable surface protein mvspF
14	Mmob	YP_016029	mvspG	variable surface protein mvspG
14	Mmob	YP_016030	mvspH	variable surface protein mvspH
14	Mmob	YP_016031	mvspI	variable surface protein mvspI
14	Mmob	YP_016033	mvspJ	variable surface protein mvspJ
14	Mmob	YP_016034	mvspK	variable surface protein mvspK
14	Mmob	YP_016035	mvspL	variable surface protein mvspL
14	Mmob	YP_016304	mvspM	variable surface protein mvspM
14	Mmob	YP_016305	mvspN	variable surface protein mvspN
14	Mmob	YP_016306	mvspO	variable surface protein mvspO
14	Mmob	YP_016330	mvspP	variable surface protein mvspP
15	Bsub	NP_389029	oppF	oligopeptide ABC transporter ATP-binding protein
15	CaPastA	YP_456723	dppF	dipeptide transport ATP-binding protein DppF
15	CaPastO	NP_950445	NA	hypothetical protein
15	CaPaus	YP_001799314	NA	ABC-type peptide/nickel transport system ATP-binding protein
15	CaPmal	YP_002004105	dppF	putative dipeptide transport ATP-binding protein
15	Cklu	YP_001394705	NA	hypothetical protein
15	Lpla	NP_784923	oppF	oligopeptide ABC transporter, ATP-binding protein
15	Maga	YP_003515227	oppF	oligopeptide ABC transporter ATP-binding protein
15	Maga	YP_003515302	oppF	oligopeptide ABC transporter ATP binding protein
15	Mgen	NP_072742	oppF	peptide ABC transporter ATP-binding protein
15	Mmob	YP_016145	oppF	oligopeptide ABC transporter ATP-binding protein
15	Mmyc	NP_975186	oppF	oligopeptide ABC transporter, ATP-binding component
15	Mmyc	NP_975935	oppF	oligopeptide ABC transporter, ATP-binding component
15	Mmyc	NP_975942	oppF	oligopeptide ABC transporter, permease component
15	Mmyc	NP_975950	oppF	oligopeptide ABC transporter, ATP-binding component
16	Bsub	NP_388836	yhdP	transporter or sensor
16	Bsub	NP_388840	yhdT	hypothetical protein
16	Bsub	NP_390355	yqhB	membrane associated protein
16	Bsub	NP_390538	yrkA	membrane associated protein
16	Bsub	NP_391008	yugS	hypothetical protein
16	CaPastA	YP_456762	tlyC	hymolysin-related protein
16	CaPastO	NP_950405	NA	hemolysin
16	CaPaus	YP_001799196	NA	Putative transporter
16	CaPmal	YP_002004309	NA	probable hemolysin
16	Cklu	YP_001395571	NA	hypothetical protein
16	Cklu	YP_001396223	NA	hypothetical protein
16	Cklu	YP_001396880	NA	hypothetical protein
16	Lpla	NP_786071	NA	integral membrane protein
16	Maga	YP_003515428	NA	hemolysin related protein
16	Mgen	NP_072808	NA	hypothetical protein
17	Bsub	NP_390803	nrnA	oligoribonuclease (nanoRNAse), 3',5'-bisphosphate nucleotidase
17	CaPastA	YP_456862	NA	exopolyphosphatase-related protein
17	CaPastO	NP_951000	NA	exopolyphosphatase-related protein
17	CaPaus	YP_001798728	NA	Phosphoesterase family protein
17	CaPmal	YP_002004203	NA	Exopolyphosphatase-related protein
17	Cklu	YP_001394823	NA	hydrolase
17	Lpla	NP_785009	NA	exopolyphosphatase-related protein (putative)
17	Lpla	NP_785765	NA	exopolyphosphatase-related protein (putative)
17	Maga	YP_003515633	NA	hypothetical protein
17	Maga	YP_003515634	NA	hypothetical protein
17	Mgen	NP_072853	mgpA	DHH family phosphoesterase
17	Mgen	NP_073043	NA	DHH family protein
17	Mmob	YP_015764	mgpA	mgpa-like protein
17	Mmyc	NP_975151	dhh	DHH family protein (MgpA-like protein)
17	Pthe	YP_001211821	NA	exopolyphosphatase-related proteins
18	Bsub	NP_388689	acoC	branched-chain alpha-keto acid dehydrogenase subunit E2
18	Bsub	NP_389343	pdhC	branched-chain alpha-keto acid dehydrogenase subunit E2
18	Bsub	NP_389818	odhB	dihydrolipoamide succinyltransferase
18	Bsub	NP_390283	bkdB	branched-chain alpha-keto acid dehydrogenase subunit E2
18	CaPastA	YP_456334	aceF	branched-chain alpha-keto acid dehydrogenase subunit E2
18	CaPastO	NP_950854	aceF	branched-chain alpha-keto acid dehydrogenase subunit E2
18	CaPaus	YP_001799263	pdhC	branched-chain alpha-keto acid dehydrogenase subunit E2
18	CaPmal	YP_002004194	aceF	branched-chain alpha-keto acid dehydrogenase subunit E2
18	Cklu	YP_001395652	pdhC	PdhC
18	Lpla	NP_785657	pdhC	pyruvate dehydrogenase complex, E2 component; dihydrolipoamide S-acetyltransferase
18	Maga	YP_003515292	pdhC	dihydrolipoamide acetyltransferase component ofpyruvate deshydrogenase complex
18	Mgen	NP_072939	pdhC	branched-chain alpha-keto acid dehydrogenase subunit E2
18	Mmob	YP_016278	pdhC	branched-chain alpha-keto acid dehydrogenase subunit E2
18	Mmob	YP_016279	pdhC	dihydrolipoamide acetyltransferase
18	Mmyc	NP_975266	pdhC	branched-chain alpha-keto acid dehydrogenase subunit E2
19	Bsub	NP_387950	ftsH	cell-division protein and general stress protein
19	CaPastA	YP_456787	ftsH	cell division protein ftsH-like protein
19	CaPastO	NP_950382	hflB	ATP-dependent Zn protease
19	CaPastO	NP_950965	hflB	ATP-dependent Zn protease
19	CaPaus	YP_001799074	hflB	ATP-dependent Zn protease
19	CaPmal	YP_002004076	hflB	ATP-dependent Zn protease
19	CaPmal	YP_002004306	hflB	ATP-dependent Zn protease
19	CaPmal	YP_002004490	hflB	ATP-dependent Zn protease
19	Cklu	YP_001393584	ftsH1	FtsH1
19	Lpla	NP_784323	ftsH	cell division protein FtsH, ATP-dependent zinc metallopeptidase
19	Maga	YP_003516012	ftsH	cell division protein FtsH
19	Mgen	NP_073127	ftsH	ATP-dependent metalloprotease FtsH
19	Mmob	YP_016237	ftsH	cell division protein ftsH
19	Mmyc	NP_975050	ftsH	ATP-dependent zinc metallopeptidase FtsH
19	Pthe	YP_001210748	HflB	ATP-dependent Zn proteases
20	Bsub	NP_388702	malQ	maltose and maltodextrin ABC transporter subunit ATP-binding protein
20	CaPastA	YP_456224	evbG	multidrug resistance ABC transporter ATP-binding and permease protein
20	CaPastO	NP_950311	mdlB	ABC-type multidrug/protein/lipid transport system, ATPase component
20	CaPaus	YP_001798792	mdlB	ABC-type multidrug/protein/lipid transport system, ATPase component
20	CaPmal	YP_002004151	evbG	Multidrug resistance ABC transporter, ATP-binding and permease protein
20	Cklu	YP_001395174	NA	transport protein
20	Cklu	YP_001395555	NA	transport protein
20	Lpla	NP_785853	NA	ABC transporter, ATP-binding and permease protein
20	Lpla	NP_786358	NA	ABC transporter, ATP-binding and permease protein
20	Maga	YP_003515521	NA	ABC transporter ATP-binding protein
20	Maga	YP_003515823	NA	ABC transporter ATP-binding protein
20	Mgen	NP_072674	NA	ABC transporter ATP-binding protein/permease
20	Mmob	YP_016049	mdlB	multidrug ABC transporter ATP-binding protein
20	Mmob	YP_016208	mldB2	ABC-type multidrug/protein/lipid transport system ATPase component
21	Bsub	NP_391593	fbaA	fructose-bisphosphate aldolase
21	Bsub	NP_391846	iolJ	2-deoxy-5-keto-D-gluconic acid 6-phosphate aldolase
21	CaPastA	YP_456743	fba	fructose bisphosphate aldolase
21	CaPastO	NP_950424	fba	fructose/tagatose bisphosphate aldolase
21	CaPaus	YP_001799098	fba	Fructose-bisphosphate aldolase class II
21	CaPmal	YP_002004149	fba	Fructose-bisphosphate aldolase
21	Cklu	YP_001396961	fba	hypothetical protein
21	Lpla	NP_784142	fba	fructose-bisphosphate aldolase
21	Maga	YP_003515273	fba	fructose bisphosphate aldolase
21	Mgen	NP_072683	fba	fructose-1,6-bisphosphate aldolase, class II
21	Mmob	YP_015823	fba	fructose-bisphosphate aldolase
21	Mmyc	NP_975144	fbaA2	fructose-bisphosphate aldolase class II
21	Mmyc	NP_975623	fbaA1	fructose-bisphosphate aldolase class-II
21	Pthe	YP_001213388	Fba	fructose-1,6-bisphosphate aldolase
22	Bsub	NP_389448	yloB	P-type calcium transport ATPase
22	CaPastA	YP_456729	mgtA	cation transport ATPase
22	CaPastO	NP_950438	mgtA	cation transport ATPase
22	CaPaus	YP_001798968	mgtA	Cation-transporting ATPase A, P type (ATPase, E1-E2 type)
22	CaPmal	YP_002004255	NA	cation transport ATPase
22	Cklu	YP_001394380	NA	cation-transporting ATPase
22	Cklu	YP_001394567	NA	cation-transporting ATPase
22	Cklu	YP_001395615	pacL	PacL
22	Lpla	NP_784341	pacL2	cation transporting P-type ATPase
22	Maga	YP_003515649	NA	cation transporting P type ATPase
22	Mgen	NP_072733	NA	ATPase P
22	Mmyc	NP_975288	ctp	cation-transporting ATPase
22	Pthe	YP_001212009	MgtA	cation transport ATPase
22	Pthe	YP_001212351	MgtA	cation transport ATPase
23	Bsub	NP_387993	fusA	elongation factor G
23	CaPastA	YP_456653	fusA	elongation factor G
23	CaPastO	NP_950516	fusA	elongation factor G
23	CaPaus	YP_001799236	fusA	elongation factor G
23	CaPmal	YP_002004425	fusA	elongation factor G
23	Cklu	YP_001393593	fusA1	elongation factor G
23	Cklu	YP_001393623	fusA2	elongation factor G
23	Lpla	NP_784722	fusA2	elongation factor G
23	Maga	YP_003515816	fusA	elongation factor G
23	Mgen	NP_072751	fus	elongation factor G
23	Mmob	YP_016064	tufA	elongation factor G
23	Mmyc	NP_975162	fusA	elongation factor G
23	Pthe	YP_001210867	FusA	translation elongation factors
23	Pthe	YP_001211945	FusA	translation elongation factors
24	Bsub	NP_391135	yurJ	multiple sugar ABC transporter ATP-binding protein
24	Bsub	NP_391760	msmX	multiple sugar-binding transporter ATP-binding protein
24	CaPastA	YP_456866	malK	ABC-type maltose/maltodextrin transport system, ATP-binding protein MalK
24	CaPastO	NP_951004	malK	ABC-type sugar transport system, ATPase component
24	CaPaus	YP_001798732	malK	ABC-type sugar transport system, ATPase component
24	CaPmal	YP_002004199	malK	ABC-type maltose/maltodextrin transport system, ATP-binding protein
24	Cklu	YP_001395190	cysA	hypothetical protein
24	Lpla	NP_784964	NA	sugar ABC transporter, ATP-binding protein (putative)
24	Lpla	NP_786829	msmK2	multiple sugar ABC transporter, ATP-binding protein
24	Maga	YP_003515716	NA	ABC transporter ATP-binding protein
24	Mgen	NP_072850	NA	ABC transporter ATP-binding protein
24	Mmob	YP_016084	malK	maltodextrin ABC transporter ATP-binding protein
24	Pthe	YP_001211227	ModC	ABC-type molybdate transport system, ATPase component
24	Pthe	YP_001211393	CysA	ABC-type sulfate/molybdate transport systems, ATPase component
25	Bsub	NP_390780	gapB	glyceraldehyde-3-phosphate dehydrogenase
25	Bsub	NP_391274	gapA	glyceraldehyde-3-phosphate dehydrogenase
25	CaPastA	YP_456741	gapA	glyceraldehyde-3-phosphate dehydrogenase
25	CaPastO	NP_950427	gapA	glyceraldehyde-3-phosphate dehydrogenase
25	CaPaus	YP_001799096	gapA	Glyceraldehyde-3-phosphate dehydrogenase
25	Cklu	YP_001394847	gap	Gap
25	Cklu	YP_001396756	NA	hypothetical protein
25	Lpla	NP_784534	gapB	glyceraldehyde 3-phosphate dehydrogenase
25	Maga	YP_003515249	gap	glyceraldehyde 3 phosphate dehydrogenase
25	Mgen	NP_072968	gap	glyceraldehyde-3-phosphate dehydrogenase
25	Mmob	YP_015884	gapA	glyceraldehyde 3-phosphate dehydrogenase
25	Mmyc	NP_975656	gap	glyceraldehyde-3-phosphate dehydrogenase
25	Pthe	YP_001211557	GapA	glyceraldehyde-3-phosphate dehydrogenase/erythrose-4-phosphate dehydrogenase
25	Pthe	YP_001213273	GapA	glyceraldehyde-3-phosphate dehydrogenase/erythrose-4-phosphate dehydrogenase
26	Bsub	NP_387967	clpC	class III stress response-related ATPase
26	Bsub	NP_389253	clpE	ATP-dependent Clp protease (class III stress gene)
26	Cklu	YP_001393599	clpC	ClpC
26	Cklu	YP_001396085	clpB	ClpB
26	Lpla	NP_784715	clpC	ATP-dependent Clp protease, ATP-binding subunit ClpC
26	Lpla	NP_784926	clpE	ATP-dependent Clp protease, ATP-binding subunit ClpE
26	Lpla	NP_785445	clpB	ATP-dependent Clp protease, ATP-binding subunit ClpB
26	Lpla	NP_786784	clpL	ATP-dependent Clp protease, ATP-binding subunit ClpL
26	Maga	YP_003515877	clp	ClpB
26	Mgen	NP_073026	clpB	ATP-dependent Clp protease, ATPase subunit
26	Mmob	YP_016062	clpB	ATP-dependent Clp protease, ATPase subunit
26	Mmyc	NP_975593	clpB	ATP dependant protease ClpB
26	Pthe	YP_001210833	ClpA	ATPase with chaperone activity, ATP-binding subunit
26	Pthe	YP_001212672	ClpA	ATPase with chaperone activity, ATP-binding subunit
27	Bsub	NP_387994	tufA	elongation factor Tu
27	CaPastA	YP_456652	tufB	elongation factor Tu
27	CaPastO	NP_950517	tufB	elongation factor Tu
27	CaPaus	YP_001799235	tufB	elongation factor Tu
27	CaPmal	YP_002004426	tuf	elongation factor Tu
27	Cklu	YP_001393610	tuf1	elongation factor Tu
27	Cklu	YP_001393624	tuf2	elongation factor Tu
27	Lpla	NP_785632	tuf	elongation factor Tu
27	Maga	YP_003515530	tufA	elongation factor Tu
27	Mgen	NP_073121	tuf	elongation factor Tu
27	Mmob	YP_015921	tuf	elongation factor Tu
27	Mmyc	NP_975163	tufA	elongation factor Tu
27	Pthe	YP_001210852	TufB	elongation factor Tu
27	Pthe	YP_001210868	TufB	elongation factor Tu
28	CaPastA	YP_456374	dnaG	DNA primase
28	CaPastA	YP_456415	dnaG	DNA primase
28	CaPastA	YP_456481	dnaG	DNA primase
28	CaPastA	YP_456812	dnaG	DNA primase
28	CaPastO	NP_950327	NA	hypothetical protein
28	CaPastO	NP_950639	NA	hypothetical protein
28	CaPastO	NP_950776	dnaG	DNA primase
28	CaPastO	NP_950801	dnaG	DNA primase
28	CaPastO	NP_950821	dnaG	DNA primase
28	CaPastO	NP_950824	dnaG	DNA primase
28	CaPastO	NP_950896	dnaG	DNA primase
28	CaPastO	NP_950937	dnaG	DNA primase
28	CaPaus	YP_001798980	NA	DNA primase
28	CaPmal	YP_002004445	dnaG2	DNA primase
29	CaPastA	YP_456406	himA	DNA-binding protein HU
29	CaPastA	YP_456426	himA	DNA-binding protein HU
29	CaPastA	YP_456573	himA	DNA-binding protein HU
29	CaPastO	NP_950815	himA	nucleoid DNA-binding protein
29	CaPaus	YP_001798741	himA	DNA-binding protein HU
29	CaPaus	YP_001798759	himA	DNA-binding protein HU
29	CaPaus	YP_001798868	himA	DNA-binding protein HU
29	CaPaus	YP_001798896	himA	DNA-binding protein HU
29	CaPaus	YP_001798947	himA	DNA-binding protein HU
29	CaPaus	YP_001798993	himA	DNA-binding protein HU
29	CaPaus	YP_001799029	himA	DNA-binding protein HU
29	CaPaus	YP_001799036	himA	DNA-binding protein HU
29	CaPaus	YP_001799306	huP	DNA-binding protein HU
29	CaPaus	YP_001799360	huP	DNA-binding protein HU
30	Bsub	NP_387894	serS	seryl-tRNA synthetase
30	CaPastA	YP_456828	serS	seryl-tRNA synthetase
30	CaPastO	NP_950335	serS	seryl-tRNA synthetase
30	CaPaus	YP_001799181	serS	seryl-tRNA synthetase
30	CaPmal	YP_002004172	serS	Seryl-tRNA synthetase
30	Cklu	YP_001393448	serS	seryl-tRNA synthetase
30	Lpla	NP_784284	serS1	seryl-tRNA synthetase
30	Lpla	NP_784713	serS2	seryl-tRNA synthetase
30	Maga	YP_003515250	serS	seryl tRNA synthetase
30	Mgen	NP_072665	serS	seryl-tRNA synthetase
30	Mmob	YP_015789	serS	seryl-tRNA synthetase
30	Mmyc	NP_975077	serS	seryl-tRNA synthetase
30	Pthe	YP_001210563	SerS	seryl-tRNA synthetase
31	Bsub	NP_390117	asnC	asparaginyl-tRNA synthetase
31	CaPastA	YP_456867	asnC	asparaginyl-tRNA synthetase
31	CaPastO	NP_951006	asnC	asparaginyl-tRNA synthetase
31	CaPaus	YP_001798733	asnC	asparaginyl-tRNA synthetase
31	CaPmal	YP_002004198	asnC	asparaginyl-tRNA synthetase
31	Cklu	YP_001393536	asnC	asparaginyl-tRNA synthetase
31	Lpla	NP_784670	asnC	asparaginyl-tRNA synthetase
31	Lpla	NP_785313	asnC	asparaginyl-tRNA synthetase
31	Maga	YP_003515512	asnS	asparaginyl tRNA synthetase
31	Mgen	NP_072775	asnC	asparaginyl-tRNA synthetase
31	Mmob	YP_016204	asnC	asparaginyl-tRNA synthetase
31	Mmyc	NP_975090	asnC	asparaginyl-tRNA synthetase
31	Pthe	YP_001211970	asnC	asparaginyl-tRNA synthetase
32	Bsub	NP_388018	adk	adenylate kinase
32	CaPastA	YP_456697	adk	adenylate kinase
32	CaPastO	NP_950473	adk	adenylate kinase
32	CaPaus	YP_001799151	adk	Adenylate kinase
32	CaPmal	YP_002004073	adk	Adenylate kinase (ATP-AMP transphosphorylase)
32	CaPmal	YP_002004493	adk	Adenylate kinase (ATP-AMP transphosphorylase)
32	Cklu	YP_001393647	adk	adenylate kinase
32	Lpla	NP_784745	adk	adenylate kinase
32	Maga	YP_003515738	adk	adenylate kinase
32	Mgen	NP_072834	adk	adenylate kinase
32	Mmob	YP_015952	adk	adenylate kinase
32	Mmyc	NP_975701	adk	adenylate kinase
32	Pthe	YP_001211968	adk	adenylate kinase
33	Bsub	NP_388019	mapA	methionine aminopeptidase
33	CaPastA	YP_456696	map	methionine aminopeptidase
33	CaPastO	NP_950474	map	methionine aminopeptidase
33	CaPaus	YP_001799150	map	Methionine aminopeptidase (MAP)
33	CaPmal	YP_002004393	map	Methionine aminopeptidase (MAP)
33	Cklu	YP_001393648	map1	Map1
33	Cklu	YP_001396174	map2	Map2
33	Lpla	NP_784075	pepM	methionyl aminopeptidase
33	Maga	YP_003515737	map	methionine aminopeptidase
33	Mgen	NP_072835	map	methionine aminopeptidase, type I
33	Mmob	YP_015953	map	methionine aminopeptidase
33	Mmyc	NP_975700	map	methionyl aminopeptidase
33	Pthe	YP_001210891	Map	methionine aminopeptidase
34	Bsub	NP_388026	cbiO	cobalt transporter ATP-binding subunit
34	CaPastA	YP_456737	cbiO	cobalt transport ATP-binding protein cbiO
34	CaPastO	NP_950431	cbiO	ABC-type cobalt transport system, ATPase component
34	CaPaus	YP_001798853	cbiO2	ABC-type cobalt import ATP-binding protein cbiO 2
34	CaPmal	YP_002004400	cbiO2	Putative cobalt import ATP-binding protein cbiO 2
34	Cklu	YP_001393656	NA	cobalt transporter ATP-binding subunit
34	Lpla	NP_784759	cbiO	cobalt transporter ATP-binding subunit
34	Maga	YP_003515731	NA	ABC transporter ATP-binding protein
34	Mgen	NP_072842	cbiO	cobalt transporter ATP-binding subunit
34	Mmob	YP_016130	cbiO	cobalt transporter ATP-binding subunit
34	Mmyc	NP_975695	cbiO	cobalt transporter ATP-binding subunit
34	Pthe	YP_001210901	CbiO	ABC-type cobalt transport system, ATPase component
34	Pthe	YP_001212208	CbiO	ABC-type cobalt transport system, ATPase component
35	Bsub	NP_390787	polA	DNA polymerase I
35	CaPastA	YP_456262	polA	DNA polymerase I
35	CaPastO	NP_950927	polA	DNA polymerase I
35	CaPastO	NP_950928	exo	5'-3' exonuclease
35	CaPaus	YP_001799379	polA	DNA polymerase I
35	CaPmal	YP_002004112	polA	DNA polymerase I
35	Cklu	YP_001394071	polA	DNA polymerase I
35	Lpla	NP_785114	polA	DNA-directed DNA polymerase I
35	Maga	YP_003515355	polA	DNA polymerase I: 5' 3' exonuclease domain
35	Mgen	NP_072928	NA	5'-3' exonuclease
35	Mmob	YP_016185	polA	DNA polymerase I
35	Mmyc	NP_975660	polA	DNA polymerase I
35	Pthe	YP_001212526	PolA	DNA polymerase I
36	Bsub	NP_389344	pdhD	dihydrolipoamide dehydrogenase
36	Bsub	NP_390286	lpdV	dihydrolipoamide dehydrogenase
36	CaPastA	YP_456335	lpd	dihydrolipoamide dehydrogenase
36	CaPastO	NP_950855	lpd	fatty acid/phospholipid biosynthesis enzyme
36	CaPaus	YP_001799264	pdhD	Dihydrolipoamide dehydrogenase
36	CaPmal	YP_002004193	lpd	Dihydrolipoamide dehydrogenase
36	Cklu	YP_001395159	bfmBC	BfmBC
36	Cklu	YP_001395651	lpdA	LpdA
36	Lpla	NP_785656	pdhD	dihydrolipoamide dehydrogenase
36	Maga	YP_003515293	pdhD	dihydrolipoamide dehydrogenase (E3 component ofpyruvate complex)
36	Mgen	NP_072938	pdhD	dihydrolipoamide dehydrogenase
36	Mmob	YP_016277	pdhD	pyruvate dehydrogenase E3 component dihydrolipoamide dehydrogenase
36	Mmyc	NP_975267	pdhD	dihydrolipoamide dehydrogenase
37	Bsub	NP_388688	acoB	acetoin dehydrogenase E1 component (TPP-dependent beta subunit)
37	Bsub	NP_389342	pdhB	pyruvate dehydrogenase (E1 beta subunit)
37	Bsub	NP_390284	bkdAB	branched-chain alpha-keto acid dehydrogenase E1 subunit
37	CaPastA	YP_456333	acoB	pyruvate dehydrogenase E1 component beta subunit
37	CaPastO	NP_950853	acoB	thiamine pyrophosphate-dependent dehydrogenase, E1 component beta subunit
37	CaPaus	YP_001799262	pdhB	Pyruvate dehydrogenase E1 comp, beta subunit
37	CaPmal	YP_002004195	acoB	Pyruvate dehydrogenase E1 component beta subunit
37	Cklu	YP_001395653	pdhB	hypothetical protein
37	Lpla	NP_785658	pdhB	pyruvate dehydrogenase complex, E1 component, beta subunit
37	Maga	YP_003515290	pdhB	pyruvate dehydrogenase E1 component, betasubunit
37	Mgen	NP_072940	pdhB	pyruvate dehydrogenase component E1, beta subunit
37	Mmob	YP_016280	pdhB	pyruvate dehydrogenase E1 component beta subunit
37	Mmyc	NP_975265	pdhB	pyruvate dehydrogenase (lipoamide), beta chain
38	Bsub	NP_390610	greA	transcription elongation factor GreA
38	CaPastA	YP_456616	greA	transcription elongation factor GreA
38	CaPastO	NP_950554	greA	transcription elongation factor GreA
38	CaPaus	YP_001799092	greA	transcription elongation factor GreA
38	CaPmal	YP_002004280	greA	transcription elongation factor GreA
38	Cklu	YP_001393589	greA	transcription elongation factor GreA
38	Cklu	YP_001396709	greA2	GreA2
38	Lpla	NP_785161	greA	transcription elongation factor GreA
38	Maga	YP_003515603	greA	transcription elongation factor greA
38	Mgen	NP_072949	greA	transcription elongation factor GreA
38	Mmob	YP_016132	greA	transcription elongation factor
38	Mmyc	NP_975295	greA	transcription elongation factor GreA
38	Pthe	YP_001210812	GreA	transcription elongation factor
39	Bsub	NP_390825	ackA	acetate kinase
39	CaPastA	YP_456756	ackA	acetate kinase
39	CaPastO	NP_950411	ackA	acetate kinase
39	CaPaus	YP_001798799	ackA	acetate kinase
39	CaPmal	YP_002004352	ackA	acetate kinase
39	Cklu	YP_001394781	ackA	AckA
39	Lpla	NP_784036	ack1	acetate kinase
39	Lpla	NP_784124	ack2	acetate kinase
39	Lpla	NP_785732	ack3	acetate kinase
39	Maga	YP_003515333	ackA	acetate kinase
39	Mgen	NP_073028	ackA	acetate kinase
39	Mmob	YP_015866	ackA	acetate kinase
39	Mmyc	NP_975269	ackA	acetate kinase
40	Bsub	NP_390773	thrS	threonyl-tRNA synthetase
40	Bsub	NP_391636	thrZ	threonyl-tRNA synthetase
40	CaPastA	YP_456859	thrS	threonyl-tRNA synthetase
40	CaPastO	NP_950997	thrS	threonyl-tRNA synthetase
40	CaPaus	YP_001798725	thrS	threonyl-tRNA synthetase
40	CaPmal	YP_002004205	thrS	Threonyl-tRNA synthetase
40	Cklu	YP_001396575	thrS	threonyl-tRNA synthetase
40	Lpla	NP_785120	thrS	threonyl-tRNA synthetase
40	Maga	YP_003515549	thrS	threonyl tRNA synthetase
40	Mgen	NP_073047	thrS	threonyl-tRNA synthetase
40	Mmob	YP_016265	thrS	threonyl-tRNA synthetase
40	Mmyc	NP_975261	thrS	threonine-tRNA ligase
40	Pthe	YP_001212506	thrS	threonyl-tRNA synthetase
41	Bsub	NP_391981	gidA	tRNA uridine 5-carboxymethylaminomethyl modification enzyme GidA
41	CaPastA	YP_456649	gidA	tRNA uridine 5-carboxymethylaminomethyl modification enzyme GidA
41	CaPastO	NP_950520	gidA	tRNA uridine 5-carboxymethylaminomethyl modification enzyme GidA
41	CaPaus	YP_001799227	gidA	tRNA uridine 5-carboxymethylaminomethyl modification enzyme GidA
41	CaPmal	YP_002004177	gidA	tRNA uridine 5-carboxymethylaminomethyl modification enzyme GidA
41	Cklu	YP_001397267	gidA	tRNA uridine 5-carboxymethylaminomethyl modification enzyme GidA
41	Lpla	NP_786868	gidA	tRNA uridine 5-carboxymethylaminomethyl modification enzyme GidA
41	Maga	YP_003515362	gidA	glucose inhibited division protein A
41	Mgen	NP_073051	gidA	tRNA uridine 5-carboxymethylaminomethyl modification enzyme GidA
41	Mmob	YP_015851	gidA	tRNA uridine 5-carboxymethylaminomethyl modification enzyme GidA
41	Mmyc	NP_975981	gidA	tRNA uridine 5-carboxymethylaminomethyl modification enzyme GidA
41	Mmyc	NP_976004	gidA	tRNA uridine 5-carboxymethylaminomethyl modification enzyme GidA
41	Pthe	YP_001213466	GidA	tRNA uridine 5-carboxymethylaminomethyl modification enzyme GidA
42	Lpla	NP_784752	ISP1	transposase
42	Lpla	NP_784937	NA	transposase
42	Lpla	NP_785074	ISP1	transposase
42	Lpla	NP_785141	ISP1	transposase
42	Lpla	NP_785534	NA	transposase, fragment
42	Lpla	NP_785536	NA	transposase, fragment
42	Lpla	NP_785537	NA	transposase, fragment
42	Lpla	NP_785549	NA	transposase, fragment
42	Lpla	NP_785550	NA	transposase, fragment
42	Lpla	NP_785667	ISP1	transposase
42	Lpla	NP_786032	ISP1	transposase
42	Lpla	NP_786355	ISP1	transposase
42	Lpla	NP_786560	ISP1	transposase
43	CaPastA	YP_456375	dnaB	replicative DNA helicase
43	CaPastA	YP_456416	dnaB	replicative DNA helicase
43	CaPastA	YP_456480	dnaB	replicative DNA helicase
43	CaPastA	YP_456813	dnaB	replicative DNA helicase
43	CaPastO	NP_950326	dnaB	replicative DNA helicase
43	CaPastO	NP_950640	dnaB	replicative DNA helicase
43	CaPastO	NP_950775	dnaB	replicative DNA helicase
43	CaPastO	NP_950802	dnaB	replicative DNA helicase
43	CaPastO	NP_950822	dnaB	replicative DNA helicase
43	CaPastO	NP_950897	dnaB	replicative DNA helicase
43	CaPastO	NP_950938	dnaB	replicative DNA helicase
43	CaPaus	YP_001798981	dnaB	Replicative DNA helicase
43	CaPmal	YP_002004450	NA	probable replicative DNA helicase
44	Mmyc	NP_975027	tnpA	IS1296SQ transposase protein A
44	Mmyc	NP_975067	tnpA	IS1296IE transposase protein A
44	Mmyc	NP_975143	tnpA	IS1296MP transposase protein A
44	Mmyc	NP_975145	tnpA	IS1296EH transposase protein A
44	Mmyc	NP_975176	tnpA	IS1296UK transposase
44	Mmyc	NP_975232	tnpA	IS1296PX transposase protein A
44	Mmyc	NP_975238	tnpA	IS1296FJ transposase protein A
44	Mmyc	NP_975610	tnpA	IS1296LL transposase protein A
44	Mmyc	NP_975641	tnpA	IS1296AB_B transposase protein A
44	Mmyc	NP_975651	tnpA	IS1296QT transposase protein A
44	Mmyc	NP_975822	tnpA	IS1296GZ transposase protein A
44	Mmyc	NP_975867	tnpA	IS1296AC_R transposase protein A
44	Mmyc	NP_975874	tnpA	IS1296DS transposase protein A
45	Bsub	NP_387883	dnaN	DNA polymerase III subunit beta
45	CaPastA	YP_456198	dnaN	DNA polymerase III, beta subunit
45	CaPastO	NP_950254	dnaN	DNA polymerase III beta subunit
45	CaPaus	YP_001798712	dnaN	DNA polymerase III beta subunit
45	CaPmal	YP_002004231	dnaN	DNA polymerase III, beta subunit
45	Cklu	YP_001393437	dnaN	DNA polymerase III subunit beta
45	Lpla	NP_783868	dnaN	DNA-directed DNA polymerase III, beta chain
45	Maga	YP_003515197	dnaN	DNA polymerase III subunit beta
45	Mgen	NP_072661	dnaN	DNA polymerase III subunit beta
45	Mmob	YP_015699	dnaN	DNA polymerase III beta chain
45	Mmyc	NP_975013	dnaN	DNA polymerase III, beta chain
45	Pthe	YP_001210552	DnaN	DNA polymerase sliding clamp subunit
46	Bsub	NP_391982	trmE	tRNA modification GTPase TrmE
46	CaPastA	YP_456861	trmE	tRNA modification GTPase TrmE
46	CaPastO	NP_950999	trmE	tRNA modification GTPase TrmE
46	CaPaus	YP_001798727	trmE	tRNA modification GTPase TrmE
46	CaPmal	YP_002004204	trmE	tRNA modification GTPase TrmE
46	Cklu	YP_001397268	trmE	tRNA modification GTPase TrmE
46	Lpla	NP_786869	trmE	tRNA modification GTPase TrmE
46	Maga	YP_003515247	trme	tRNA modification GTPase TrmE
46	Mgen	NP_072668	trmE	tRNA modification GTPase TrmE
46	Mmob	YP_016259	trmE	tRNA modification GTPase TrmE
46	Mmyc	NP_975095	trmE	tRNA modification GTPase TrmE
46	Pthe	YP_001213467	trmE	tRNA modification GTPase TrmE
47	Bsub	NP_387920	yabD	metal-dependent DNase
47	CaPastA	YP_456336	tatD	Mg-dependent DNase
47	CaPastO	NP_950857	tatD	Mg-dependent DNase
47	CaPaus	YP_001799265	tatD	Mg-dependent DNase
47	CaPmal	YP_002004192	tatD	Mg-dependent DNase
47	Cklu	YP_001397121	NA	deoxyribonuclease
47	Lpla	NP_784248	NA	DNAse (putative)
47	Maga	YP_003515246	NA	hypothetical protein
47	Mgen	NP_072669	NA	TatD family deoxyribonuclease
47	Mmob	YP_016260	tatD	Mg-dependent DNAse
47	Mmyc	NP_975914	NA	deoxyribonuclease, TatD related
47	Pthe	YP_001210620	TatD	Mg-dependent DNase
48	Bsub	NP_390424	dnaJ	chaperone protein DnaJ
48	CaPastA	YP_456258	dnaJ	molecular chaperone DnaJ
48	CaPastO	NP_950955	dnaJ	molecular chaperone DnaJ
48	CaPaus	YP_001799139	dnaJ	Chaperone protein DnaJ
48	CaPmal	YP_002004244	dnaJ	Chaperone protein
48	Cklu	YP_001394302	dnaJ	chaperone protein DnaJ
48	Lpla	NP_785551	dnaJ	chaperone protein DnaJ
48	Maga	YP_003515995	dnaJ	heat shock protein DNAJ
48	Mgen	NP_072679	dnaJ	chaperone protein DnaJ
48	Mmob	YP_016182	dnaJ	heat shock protein DnaJ
48	Mmyc	NP_975589	dnaJ	chaperone protein DnaJ
48	Pthe	YP_001211429	DnaJ	DnaJ-class molecular chaperone
49	Bsub	NP_387919	metS	methionyl-tRNA synthetase
49	CaPastA	YP_456685	metG	methionyl-tRNA synthetase
49	CaPastO	NP_950485	metG	methionyl-tRNA synthetase
49	CaPaus	YP_001798806	metG	methionyl-tRNA synthetase
49	CaPmal	YP_002004407	metG	methionyl-tRNA synthetase
49	Cklu	YP_001397122	metS	methionyl-tRNA synthetase
49	Lpla	NP_784246	metS	methionine--tRNA ligase
49	Maga	YP_003515392	metS	methionyl tRNA synthetase
49	Mgen	NP_072681	metS	methionyl-tRNA synthetase
49	Mmob	YP_016012	metG	methionyl-tRNA synthetase
49	Mmyc	NP_975023	metS	methionyl-tRNA synthetase
49	Pthe	YP_001210619	MetG	methionyl-tRNA synthetase
50	Bsub	NP_391972	yyaF	GTP-dependent nucleic acid-binding protein EngD
50	CaPastA	YP_456732	NA	GTP-dependent nucleic acid-binding protein EngD
50	CaPastO	NP_950435	NA	GTP-dependent nucleic acid-binding protein EngD
50	CaPaus	YP_001798970	NA	GTP-dependent nucleic acid-binding protein EngD
50	CaPmal	YP_002004285	NA	GTP-dependent nucleic acid-binding protein EngD
50	Cklu	YP_001394570	NA	GTP-dependent nucleic acid-binding protein EngD
50	Lpla	NP_786473	NA	GTP-dependent nucleic acid-binding protein EngD
50	Maga	YP_003515600	NA	GTP binding protein
50	Mgen	NP_072684	NA	GTP-dependent nucleic acid-binding protein EngD
50	Mmob	YP_016299	NA	GTP-dependent nucleic acid-binding protein EngD
50	Mmyc	NP_975883	NA	GTP-dependent nucleic acid-binding protein EngD
50	Pthe	YP_001211477	NA	GTP-dependent nucleic acid-binding protein EngD
51	Bsub	NP_390325	efp	elongation factor P
51	CaPastA	YP_456641	efp	elongation factor P
51	CaPastO	NP_950528	efp	elongation factor P
51	CaPaus	YP_001799220	efp	elongation factor P
51	CaPmal	YP_002004164	efp	elongation factor P
51	Cklu	YP_001394606	efp	elongation factor P
51	Lpla	NP_785189	efp	elongation factor P
51	Maga	YP_003515518	efp	elongation factor P
51	Mgen	NP_072686	efp	elongation factor P
51	Mmob	YP_016248	efp	elongation factor P
51	Mmyc	NP_975437	efp	elongation factor P
51	Pthe	YP_001211712	Efp	elongation factor P
52	Bsub	NP_389540	polC	DNA polymerase III PolC
52	CaPastA	YP_456509	polC	DNA polymerase III alpha subunit
52	CaPastO	NP_950717	polC	DNA polymerase III alpha subunit
52	CaPaus	YP_001799126	polC	DNA polymerase III alpha subunit
52	CaPmal	YP_002004121	polC1	DNA polymerase III alpha subunit
52	CaPmal	YP_002004452	polC2	DNA polymerase III alpha subunit
52	Cklu	YP_001394816	polC	DNA polymerase III PolC
52	Lpla	NP_785570	polC	DNA polymerase III PolC
52	Maga	YP_003515259	polC	DNA polymerase III subunit alpha
52	Mgen	NP_072691	polC	DNA polymerase III PolC
52	Mmob	YP_015754	polC	DNA polymerase III PolC
52	Mmyc	NP_975350	polC	DNA polymerase III alpha chain
53	Bsub	NP_390634	hisS	histidyl-tRNA synthetase
53	CaPastA	YP_456790	hisS	histidyl-tRNA synthetase
53	CaPastO	NP_950379	hisS	histidyl-tRNA synthetase
53	CaPaus	YP_001799071	hisS	histidyl-tRNA synthetase
53	CaPmal	YP_002004303	hisS	histidyl-tRNA synthetase
53	Cklu	YP_001396506	hisS	histidyl-tRNA synthetase
53	Lpla	NP_785515	hisS	histidyl-tRNA synthetase
53	Maga	YP_003515639	hisS	Histidyl tRNA synthetase
53	Mgen	NP_072695	hisS	histidyl-tRNA synthetase
53	Mmob	YP_015970	hisS	histidyl-tRNA synthetase
53	Mmyc	NP_975332	hisS	histidyl-tRNA synthetase
53	Pthe	YP_001211598	hisS	histidyl-tRNA synthetase
54	Bsub	NP_390633	aspS	aspartyl-tRNA synthetase
54	CaPastA	YP_456789	aspS	aspartyl-tRNA synthetase
54	CaPastO	NP_950380	aspS	aspartyl-tRNA synthetase
54	CaPaus	YP_001799072	aspS	aspartyl-tRNA synthetase
54	CaPmal	YP_002004304	aspS	aspartyl-tRNA synthetase
54	Cklu	YP_001396505	aspS	aspartyl-tRNA synthetase
54	Lpla	NP_785514	aspS	aspartyl-tRNA synthetase
54	Maga	YP_003515638	aspS	aspartyl tRNA synthetase
54	Mgen	NP_072696	aspS	aspartyl-tRNA synthetase
54	Mmob	YP_015971	aspS	aspartyl-tRNA synthetase
54	Mmyc	NP_975331	aspS	aspartyl-tRNA synthetase
54	Pthe	YP_001211599	aspS	aspartyl-tRNA synthetase
55	CaPastA	YP_456291	potA	ABC-type spermidine/putrescine transport, ATP-binding protein PotA
55	CaPastO	NP_950911	potA	ABC-type spermidine/putrescine transport systems, ATPase component
55	CaPaus	YP_001798813	potA	ABC-type spermidine/putrescine transport systems, ATPase component
55	CaPmal	YP_002004323	potA	ABC-type spermidine/putrescine transport, ATP-binding protein
55	Cklu	YP_001396158	NA	ABC transporter ATPase
55	Lpla	NP_784132	potA	spermidine/putrescine ABC transporter, ATP-binding protein
55	Maga	YP_003515320	potA	spermidine/putrescine ABC transporter ATP-binding protein PotA
55	Mgen	NP_072702	potA	spermidine/putrescine ABC transporter ATP-binding protein
55	Mmob	YP_015745	potA	spermidine/putrescine ABC transporter ATP-binding protein
55	Mmyc	NP_975225	potA	spermidine/putrescine ABC transporter ATP-binding component
55	Pthe	YP_001211021	CbiO	ABC-type cobalt transport system, ATPase component
55	Pthe	YP_001212814	CysA	ABC-type sulfate/molybdate transport systems, ATPase component
56	Bsub	NP_388475	gcp	DNA-binding/iron metalloprotein/AP endonuclease
56	CaPastA	YP_456447	qri7	O-sialoglycoprotein endopeptidase
56	CaPastO	NP_950831	QRI7	glycoprotein endopeptidase
56	CaPaus	YP_001798776	gcp	putative DNA-binding/iron metalloprotein/AP endonuclease
56	CaPmal	YP_002004237	NA	putative DNA-binding/iron metalloprotein/AP endonuclease
56	Cklu	YP_001393848	gcp	DNA-binding/iron metalloprotein/AP endonuclease
56	Lpla	NP_784478	gcp	putative DNA-binding/iron metalloprotein/AP endonuclease
56	Maga	YP_003515533	gcp	o sialoglycoprotein endopeptidase(Glycoprotease)
56	Mgen	NP_072706	NA	DNA-binding/iron metalloprotein/AP endonuclease
56	Mmob	YP_015827	gcp	putative DNA-binding/iron metalloprotein/AP endonuclease
56	Mmyc	NP_975093	gcp	putative DNA-binding/iron metalloprotein/AP endonuclease
56	Pthe	YP_001213205	QRI7	metal-dependent proteases
57	Bsub	NP_389480	ffh	signal recognition particle-like (SRP) GTPase
57	CaPastA	YP_456261	ffh	signal recognition particle, subunit FFH/SRP54
57	CaPastO	NP_950930	ffh	signal recognition particle GTPase
57	CaPaus	YP_001799380	ffh	Signal recognition particle GTPase
57	CaPmal	YP_002004113	ffh	Signal recognition particle, subunit FFH/SRP54
57	Cklu	YP_001394791	NA	hypothetical protein
57	Lpla	NP_785225	ffh	signal recognition particle protein Ffh
57	Maga	YP_003515805	ffh	signal recognition particle protein
57	Mgen	NP_072708	ffh	signal recognition particle protein
57	Mmob	YP_016224	ffh	signal recognition particle GTPase
57	Mmyc	NP_975409	ffh	Signal recognition particle M54 protein
57	Pthe	YP_001212274	Ffh	signal recognition particle GTPase
58	Bsub	NP_387917	yabC	methyltransferase
58	CaPastA	YP_456686	tpm	tetrapyrrole (Corrin/Porphyrin) methylase
58	CaPastO	NP_950484	NA	hypothetical protein
58	CaPaus	YP_001798845	NA	Putative methyltransferase
58	CaPmal	YP_002004406	tpm	tetrapyrrole (Corrin/Porphyrin) methylase
58	Cklu	YP_001397142	NA	methyltransferase
58	Lpla	NP_784466	NA	methyltransferase (putative)
58	Maga	YP_003515934	NA	hypothetical protein
58	Mgen	NP_072718	NA	tetrapyrrole (corrin/porphyrin) methylase protein
58	Mmob	YP_016222	NA	putative SAM-dependent methyltransferase
58	Mmyc	NP_975548	NA	tetrapyrrole methylas family protein
58	Pthe	YP_001210616	NA	methyltransferase
59	Bsub	NP_391240	smpB	SsrA-binding protein
59	CaPastA	YP_456770	smpB	SsrA-binding protein
59	CaPastO	NP_950398	smpB	SsrA-binding protein
59	CaPaus	YP_001799188	smpB	SsrA-binding protein
59	CaPmal	YP_002004361	smpB	SsrA-binding protein
59	Cklu	YP_001396749	smpB	SsrA-binding protein
59	Lpla	NP_784543	smpB	SsrA-binding protein
59	Maga	YP_003516006	smpB	ssrA binding protein
59	Mgen	NP_072721	smpB	SsrA-binding protein
59	Mmob	YP_015961	smpB	SsrA-binding protein
59	Mmyc	NP_975827	smpB	SsrA-binding protein
59	Pthe	YP_001213262	smpB	SsrA-binding protein
60	Bsub	NP_389531	rpsB	30S ribosomal protein S2
60	CaPastA	YP_456750	rpsB	30S ribosomal protein S2
60	CaPastO	NP_950417	rpsB	30S ribosomal protein S2
60	CaPaus	YP_001799105	rpsB	30S ribosomal protein S2
60	CaPmal	YP_002004266	rpsB	30S ribosomal protein S2
60	Cklu	YP_001394807	rpsB	30S ribosomal protein S2
60	Lpla	NP_785578	rpsB	30S ribosomal protein S2
60	Maga	YP_003515444	rpsB	30S ribosomal protein S2
60	Mgen	NP_072732	rpsB	30S ribosomal protein S2
60	Mmob	YP_015873	rpsB	30S ribosomal protein S2
60	Mmyc	NP_975588	rpsB	30S ribosomal protein S2
60	Pthe	YP_001211802	rpsB	30S ribosomal protein S2
61	Bsub	NP_391410	secA	preprotein translocase subunit SecA
61	CaPastA	YP_456500	secA	preprotein translocase subunit SecA
61	CaPastO	NP_950726	secA	preprotein translocase subunit SecA
61	CaPaus	YP_001799136	secA	preprotein translocase subunit SecA
61	CaPmal	YP_002004140	secA	preprotein translocase subunit SecA
61	Cklu	YP_001396979	secA	preprotein translocase subunit SecA
61	Lpla	NP_784491	secA	preprotein translocase subunit SecA
61	Maga	YP_003515458	secA	preprotein translocase SecA subunit
61	Mgen	NP_072734	secA	preprotein translocase subunit SecA
61	Mmob	YP_015783	secA	preprotein translocase subunit SecA
61	Mmyc	NP_975099	secA	preprotein translocase subunit SecA
61	Pthe	YP_001213303	secA	preprotein translocase subunit SecA
62	Bsub	NP_387983	rplK	50S ribosomal protein L11
62	CaPastA	YP_456661	rplK	50S ribosomal protein L11
62	CaPastO	NP_950508	rplK	50S ribosomal protein L11
62	CaPaus	YP_001799244	rplK	50S ribosomal protein L11
62	CaPmal	YP_002004417	rplK	50S ribosomal protein L11
62	Cklu	YP_001393614	rplK	50S ribosomal protein L11
62	Lpla	NP_784387	rplK	50S ribosomal protein L11
62	Maga	YP_003515275	rplK	50S ribosomal protein L11
62	Mgen	NP_072743	rplK	50S ribosomal protein L11
62	Mmob	YP_015837	rplK	50S ribosomal protein L11/unknown domain fusion protein
62	Mmyc	NP_975961	rplK	50S ribosomal protein L11
62	Pthe	YP_001210856	rplK	50S ribosomal protein L11
63	Bsub	NP_387984	rplA	50S ribosomal protein L1
63	CaPastA	YP_456660	rplA	50S ribosomal protein L1
63	CaPastO	NP_950509	rplA	50S ribosomal protein L1
63	CaPaus	YP_001799243	rplA	50S ribosomal protein L1
63	CaPmal	YP_002004418	rplA	50S ribosomal protein L1
63	Cklu	YP_001393615	rplA	50S ribosomal protein L1
63	Lpla	NP_784388	rplA	50S ribosomal protein L1
63	Maga	YP_003515276	rplA	50S ribosomal protein L1
63	Mgen	NP_072744	rplA	50S ribosomal protein L1
63	Mmob	YP_015836	rplA	50S ribosomal protein L1
63	Mmyc	NP_975962	rplA	50S ribosomal protein L1
63	Pthe	YP_001210857	rplA	50S ribosomal protein L1
64	Bsub	NP_387934	pth	peptidyl-tRNA hydrolase
64	CaPastA	YP_456763	pth	peptidyl-tRNA hydrolase
64	CaPastO	NP_950404	pth	peptidyl-tRNA hydrolase
64	CaPaus	YP_001799195	pth	peptidyl-tRNA hydrolase
64	CaPmal	YP_002004257	pth	peptidyl-tRNA hydrolase
64	Cklu	YP_001393569	pth	peptidyl-tRNA hydrolase
64	Lpla	NP_784315	pth	peptidyl-tRNA hydrolase
64	Maga	YP_003516014	pth	peptidyl tRNA hydrolase
64	Mgen	NP_072745	pth	peptidyl-tRNA hydrolase
64	Mmob	YP_016238	pth	peptidyl-tRNA hydrolase
64	Mmyc	NP_975921	pth	peptidyl-tRNA hydrolase
64	Pthe	YP_001210663	PTH	peptidyl-tRNA hydrolase
65	Bsub	NP_387991	rpsL	30S ribosomal protein S12
65	CaPastA	YP_456655	rpsL	30S ribosomal protein S12
65	CaPastO	NP_950514	rpsL	30S ribosomal protein S12
65	CaPaus	YP_001799238	rpsL	30S ribosomal protein S12
65	CaPmal	YP_002004423	rpsL	30S ribosomal protein S12
65	Cklu	YP_001393621	rpsL	30S ribosomal protein S12
65	Lpla	NP_784720	rpsL	30S ribosomal protein S12
65	Maga	YP_003515818	rpsL	30S ribosomal protein S12
65	Mgen	NP_072749	rpsL	30S ribosomal protein S12
65	Mmob	YP_016066	rpsL	30S ribosomal protein S12
65	Mmyc	NP_975160	rpsL	30S ribosomal protein S12
65	Pthe	YP_001210865	rpsL	30S ribosomal protein S12
66	Bsub	NP_387992	rpsG	30S ribosomal protein S7
66	CaPastA	YP_456654	rpsG	30S ribosomal protein S7
66	CaPastO	NP_950515	rpsG	30S ribosomal protein S7
66	CaPaus	YP_001799237	rpsG	30S ribosomal protein S7
66	CaPmal	YP_002004424	rpsG	30S ribosomal protein S7
66	Cklu	YP_001393622	rpsG	30S ribosomal protein S7
66	Lpla	NP_784721	rpsG	30S ribosomal protein S7
66	Maga	YP_003515817	rpsG	30S ribosomal protein S7
66	Mgen	NP_072750	rpS7	30S ribosomal protein S7
66	Mmob	YP_016065	rpsG	30S ribosomal protein S7
66	Mmyc	NP_975161	rpsG	30S ribosomal protein S7
66	Pthe	YP_001210866	RpsG	30S ribosomal protein S7
67	Bsub	NP_391924	dnaC	replicative DNA helicase
67	CaPastA	YP_456203	dnaB	replicative DNA helicase
67	CaPastO	NP_950265	dnaB	replicative DNA helicase
67	CaPaus	YP_001798826	dnaC	Replicative DNA helicase
67	CaPmal	YP_002004213	dnaB1	Replicative DNA helicase
67	Cklu	YP_001397249	NA	replicative DNA helicase
67	Lpla	NP_783878	dnaC	replicative DNA helicase DnaC
67	Maga	YP_003515427	dnaB	Replicative DNA helicase
67	Mgen	NP_072756	dnaB	replicative DNA helicase
67	Mmob	YP_015868	dnaB	replicative DNA helicase
67	Mmyc	NP_975923	dnaC	replicative DNA helicase DnaC
67	Pthe	YP_001213435	DnaB	replicative DNA helicase
68	Bsub	NP_388056	ybbP	hypothetical protein
68	Bsub	NP_389825	yojJ	hypothetical protein
68	CaPastA	YP_456439	NA	hypothetical protein
68	CaPastO	NP_950836	NA	uncharacterized ACR
68	CaPaus	YP_001798773	NA	hypothetical protein
68	CaPmal	YP_002004345	NA	hypothetical protein
68	Cklu	YP_001393715	NA	hypothetical protein
68	Lpla	NP_784560	NA	hypothetical protein
68	Maga	YP_003515515	NA	hypothetical protein
68	Mgen	NP_072767	NA	hypothetical protein
68	Mmob	YP_016152	NA	hypothetical protein
68	Pthe	YP_001211086	NA	hypothetical protein
69	Bsub	NP_389450	gmk	guanylate kinase
69	CaPastA	YP_456851	gmk	guanylate kinase
69	CaPastO	NP_950989	gmk	guanylate kinase
69	CaPaus	YP_001798784	gmk	guanylate kinase
69	CaPmal	YP_002004475	gmk	guanylate kinase
69	Cklu	YP_001394755	gmk	guanylate kinase
69	Lpla	NP_785204	gmk	guanylate kinase
69	Maga	YP_003515396	gmk	Guanylate kinase
69	Mgen	NP_072769	gmk	guanylate kinase
69	Mmob	YP_016254	gmk	guanylate kinase
69	Mmyc	NP_975219	gmk	guanylate kinase
69	Pthe	YP_001212345	gmk	guanylate kinase
70	Bsub	NP_389460	yloQ	ribosome-associated GTPase
70	CaPastA	YP_456733	NA	GTPase
70	CaPastO	NP_950434	NA	hypothetical protein
70	CaPaus	YP_001798971	engC	GTPase EngC
70	CaPmal	YP_002004118	engC	Probable GTPase EngC
70	Cklu	YP_001394766	NA	ribosome-associated GTPase
70	Lpla	NP_785212	NA	translation factor, GTPase (putative)
70	Maga	YP_003515399	engC	GTPase EngC
70	Mgen	NP_072772	NA	ribosome small subunit-dependent GTPase A
70	Mmob	YP_016257	NA	GTPase protein
70	Mmyc	NP_975305	NA	hypothetical protein
70	Pthe	YP_001212330	NA	GTPase
71	Bsub	NP_391013	pgi	glucose-6-phosphate isomerase
71	CaPastA	YP_456634	pgi	glucose-6-phosphate isomerase
71	CaPastO	NP_950535	pgi	glucose-6-phosphate isomerase
71	CaPaus	YP_001798844	pgi	glucose-6-phosphate isomerase
71	CaPmal	YP_002004408	pgi	glucose-6-phosphate isomerase
71	Cklu	YP_001396853	pgi	Pgi
71	Lpla	NP_785941	pgi	glucose-6-phosphate isomerase
71	Maga	YP_003515526	pgiB	glucose 6 phosphate isomerase
71	Mgen	NP_072773	pgi	glucose-6-phosphate isomerase
71	Mmob	YP_016251	pgi	glucose-6-phosphate isomerase
71	Mmyc	NP_975491	pgi	glucose-6-phosphate isomerase
71	Pthe	YP_001213281	NA	hypothetical protein
72	Bsub	NP_389574	pgsA	CDP-diacylglycerol-glycerol-3-phosphate 3-phosphatidyltransferase
72	CaPastA	YP_456249	pgsA	CDP-diacylglycerol-glycerol-3-phosphate 3-phosphatidyltransferase
72	CaPastO	NP_950970	NA	phosphatidylglycerophosphate synthase
72	CaPaus	YP_001799371	pgsA	Phosphatidylglycerophosphate synthase
72	CaPmal	YP_002004174	pgsA	Phosphatidylglycerophosphate synthase
72	Cklu	YP_001394834	pgsA	hypothetical protein
72	Lpla	NP_785781	pgsA	CDP-diacylglycerol--glycerol-3-phosphate 3-phosphatidyltransferase
72	Maga	YP_003515945	pgsA	CDP diacylglycerol glycerol 3 phosphate 3 phosphatidyltransferase
72	Mgen	NP_072776	pgsA	CDP-diacylglycerol--glycerol-3-phosphate 3-phosphatidyltransferase
72	Mmob	YP_016054	pgsA	phosphatidylglycerophosphate synthase
72	Mmyc	NP_975880	pgsA	cdpdiacylglycerol-glycerol-3-phosphate 3-phosphatidyltransferase
72	Pthe	YP_001211847	PgsA	phosphatidylglycerophosphate synthase
73	Bsub	NP_389494	topA	DNA topoisomerase I
73	CaPastA	YP_456638	topA	DNA topoisomerase
73	CaPastO	NP_950531	topA	topoisomerase IA
73	CaPaus	YP_001799217	topA	Topoisomerase IA
73	CaPmal	YP_002004115	topA	DNA topoisomerase I
73	Cklu	YP_001394805	NA	DNA topoisomerase I
73	Lpla	NP_785400	topA	DNA topoisomerase I
73	Maga	YP_003515460	topA	DNA topoisomerase I
73	Mgen	NP_072784	topA	DNA topoisomerase I
73	Mmob	YP_015779	topA	DNA topoisomerase I
73	Mmyc	NP_975898	topA	DNA topoisomerase I
73	Pthe	YP_001211796	TopA	topoisomerase IA
74	Bsub	NP_389024	trpS	tryptophanyl-tRNA synthetase
74	CaPastA	YP_456508	trpS	tryptophanyl-tRNA synthetase
74	CaPastO	NP_950718	trpS	tryptophanyl-tRNA synthetase
74	CaPaus	YP_001799127	trpS	Tryptophanyl-tRNA synthetase
74	CaPmal	YP_002004132	trpS	Tryptophanyl-tRNA synthetase
74	Cklu	YP_001394012	trpS	tryptophanyl-tRNA synthetase
74	Lpla	NP_784229	trpS	tryptophanyl-tRNA synthetase II
74	Maga	YP_003515548	NA	tryptophanyl tRNA synthetase
74	Mgen	NP_072788	trpS	tryptophanyl-tRNA synthetase
74	Mmob	YP_016198	trpS	tryptophanyl-tRNA synthetase
74	Mmyc	NP_975353	trpS	tryptophan-tRNA ligase
74	Pthe	YP_001211788	TrpS	tryptophanyl-tRNA synthetase
75	Bsub	NP_387963	lysS	lysyl-tRNA synthetase
75	CaPastA	YP_456324	lysU	lysyl-tRNA synthetase
75	CaPastO	NP_950841	lysU	lysyl-tRNA synthetase class II
75	CaPaus	YP_001799121	lysU	Lysyl-tRNA synthetase (class II)
75	CaPmal	YP_002004136	lysU	Lysyl-tRNA synthetase
75	Cklu	YP_001393590	lysS	lysyl-tRNA synthetase
75	Lpla	NP_784326	lysS	lysyl-tRNA synthetase
75	Maga	YP_003515874	lysS	Lysyl tRNA synthetase
75	Mgen	NP_072798	lysS	lysyl-tRNA synthetase
75	Mmob	YP_015741	lysS	lysyl-tRNA synthetase
75	Mmyc	NP_975080	lysS	lysyl-tRNA synthetase
75	Pthe	YP_001210813	lysS	lysyl-tRNA synthetase
76	Bsub	NP_390429	lepA	GTP-binding protein LepA
76	CaPastA	YP_456526	lepA	GTP-binding protein LepA
76	CaPastO	NP_950697	lepA	GTP-binding protein LepA
76	CaPaus	YP_001798888	lepA	GTP-binding protein LepA
76	CaPmal	YP_002004322	lepA	GTP-binding protein LepA
76	Cklu	YP_001394297	lepA	GTP-binding protein LepA
76	Lpla	NP_785542	lepA1	GTP-binding protein LepA
76	Maga	YP_003515692	lepA	GTP binding protein LepA
76	Mgen	NP_072800	lepA	GTP-binding protein LepA
76	Mmob	YP_016100	lepA	GTP-binding protein LepA
76	Mmyc	NP_975328	lepA	GTP-binding protein LepA
76	Pthe	YP_001211423	LepA	GTP-binding protein LepA
77	Bsub	NP_389336	rnjA	ribonuclease J1
77	CaPastA	YP_456297	NA	metallo-beta-lactamase superfamily hydrolase
77	CaPastO	NP_950885	NA	hypothetical protein
77	CaPaus	YP_001798720	NA	Metallo-beta-lactamase family protein
77	CaPmal	YP_002004248	NA	Predicted hydrolase of the metallo-beta-lactamase superfamily
77	Cklu	YP_001394719	NA	metal-dependent hydrolase
77	Lpla	NP_785663	NA	metallo-beta-lactamase superfamily protein (putative)
77	Maga	YP_003515978	NA	hypothetical protein
77	Mgen	NP_072801	NA	metallo-beta-lactamase superfamily protein
77	Mmob	YP_016315	NA	hydrolase
77	Mmyc	NP_975648	NA	hypothetical protein
77	Pthe	YP_001211839	NA	hydrolase
78	Bsub	NP_389542	nusA	transcription elongation factor NusA
78	CaPastA	YP_456768	nusA	transcription elongation factor NusA
78	CaPastO	NP_950400	nusA	transcription elongation factor NusA
78	CaPaus	YP_001799191	nusA	transcription elongation factor NusA
78	CaPmal	YP_002004346	nusA	transcription elongation factor NusA
78	Cklu	YP_001394818	nusA	transcription elongation factor NusA
78	Lpla	NP_785568	nusA	transcription elongation factor NusA
78	Maga	YP_003515952	nusA	transcription elongation protein NusA
78	Mgen	NP_072803	nusA	transcription elongation factor NusA
78	Mmob	YP_015847	nusA	transcription elongation factor NusA
78	Mmyc	NP_975347	nusA	transcription elongation factor NusA
78	Pthe	YP_001211816	nusA	transcription elongation factor NusA
79	Bsub	NP_389545	infB	translation initiation factor IF-2
79	CaPastA	YP_456766	infB	translation initiation factor IF-2
79	CaPastO	NP_950402	infB	translation initiation factor IF-2
79	CaPaus	YP_001799193	infB	translation initiation factor IF-2
79	CaPmal	YP_002004348	infB	translation initiation factor IF-2
79	Cklu	YP_001394821	infB	translation initiation factor IF-2
79	Lpla	NP_785565	infB	translation initiation factor IF-2
79	Maga	YP_003515950	infB	translation initiation factor IF 2
79	Mgen	NP_072804	infB	translation initiation factor IF-2
79	Mmob	YP_015849	infB	translation initiation factor IF-2
79	Mmyc	NP_975344	infB	translation initiation factor IF-2
79	Pthe	YP_001211819	InfB	translation initiation factor 2
80	Bsub	NP_387996	rpsJ	30S ribosomal protein S10
80	CaPastA	YP_456720	rpsJ	30S ribosomal protein S10
80	CaPastO	NP_950451	rpsJ	30S ribosomal protein S10
80	CaPaus	YP_001799173	rpsJ	30S ribosomal protein S10
80	CaPmal	YP_002004371	rpsJ	30S ribosomal protein S10
80	Cklu	YP_001393625	rpsJ	30S ribosomal protein S10
80	Lpla	NP_784723	rpsJ	30S ribosomal protein S10
80	Maga	YP_003515771	rpsJ	30S ribosomal protein S10
80	Mgen	NP_072813	rpsJ	30S ribosomal protein S10
80	Mmob	YP_015931	rpsJ	30S ribosomal protein S10
80	Mmyc	NP_975722	rpsJ	30S ribosomal protein S10
80	Pthe	YP_001210869	RpsJ	ribosomal protein S10
81	Bsub	NP_387997	rplC	50S ribosomal protein L3
81	CaPastA	YP_456718	rplC	50S ribosomal protein L3
81	CaPastO	NP_950452	rplC	ribosomal protein L3
81	CaPaus	YP_001799172	rplC	50S ribosomal protein L3
81	CaPmal	YP_002004372	rplC	50S ribosomal protein L3
81	Cklu	YP_001393626	rplC	50S ribosomal protein L3
81	Lpla	NP_784724	rplC	50S ribosomal protein L3
81	Maga	YP_003515770	rplC	50S ribosomal protein L3
81	Mgen	NP_072814	rplC	50S ribosomal protein L3
81	Mmob	YP_015932	rplC	50S ribosomal protein L3
81	Mmyc	NP_975721	rplC	50S ribosomal protein L3
81	Pthe	YP_001210870	rplC	50S ribosomal protein L3
82	Bsub	NP_387998	rplD	50S ribosomal protein L4
82	CaPastA	YP_456717	rplD	50S ribosomal protein L4
82	CaPastO	NP_950453	rplD	50S ribosomal protein L4
82	CaPaus	YP_001799171	rplD	50S ribosomal protein L4
82	CaPmal	YP_002004373	rplD	50S ribosomal protein L4
82	Cklu	YP_001393627	rplD	50S ribosomal protein L4
82	Lpla	NP_784725	rplD	50S ribosomal protein L4
82	Maga	YP_003515769	rplD	50S ribosomal protein L4
82	Mgen	NP_072815	rplD	50S ribosomal protein L4
82	Mmob	YP_015933	rplD	50S ribosomal protein L4
82	Mmyc	NP_975720	rplD	50S ribosomal protein L4
82	Pthe	YP_001210871	rplD	50S ribosomal protein L4
83	Bsub	NP_388000	rplB	50S ribosomal protein L2
83	CaPastA	YP_456715	rplB	50S ribosomal protein L2
83	CaPastO	NP_950455	rplB	50S ribosomal protein L2
83	CaPaus	YP_001799169	rplB	50S ribosomal protein L2
83	CaPmal	YP_002004375	rplB	50S ribosomal protein L2
83	Cklu	YP_001393629	rplB	50S ribosomal protein L2
83	Lpla	NP_784727	rplB	50S ribosomal protein L2
83	Maga	YP_003515767	rplB	50S ribosomal protein L2
83	Mgen	NP_072817	rplB	50S ribosomal protein L2
83	Mmob	YP_015935	rplB	50S ribosomal protein L2
83	Mmyc	NP_975718	rplB	50S ribosomal protein L2
83	Pthe	YP_001210873	rplB	50S ribosomal protein L2
84	Bsub	NP_388001	rpsS	30S ribosomal protein S19
84	CaPastA	YP_456714	rpsS	30S ribosomal protein S19
84	CaPastO	NP_950456	rpsS	30S ribosomal protein S19
84	CaPaus	YP_001799168	rpsS	30S ribosomal protein S19
84	CaPmal	YP_002004376	rpsS	30S ribosomal protein S19
84	Cklu	YP_001393630	rpsS	30S ribosomal protein S19
84	Lpla	NP_784728	rpsS	30S ribosomal protein S19
84	Maga	YP_003515766	rpsS	30S ribosomal protein S19
84	Mgen	NP_072818	rpsS	30S ribosomal protein S19
84	Mmob	YP_015936	rpsS	30S ribosomal protein s19
84	Mmyc	NP_975717	rpsS	30S ribosomal protein S19
84	Pthe	YP_001210874	rpsS	30S ribosomal protein S19
85	Bsub	NP_388002	rplV	50S ribosomal protein L22
85	CaPastA	YP_456713	rplV	50S ribosomal protein L22
85	CaPastO	NP_950457	rplV	50S ribosomal protein L22
85	CaPaus	YP_001799167	rplV	50S ribosomal protein L22
85	CaPmal	YP_002004377	rplV	50S ribosomal protein L22
85	Cklu	YP_001393631	rplV	50S ribosomal protein L22
85	Lpla	NP_784729	rplV	50S ribosomal protein L22
85	Maga	YP_003515765	rplV	50S ribosomal protein L22
85	Mgen	NP_072819	rplV	50S ribosomal protein L22
85	Mmob	YP_015937	rplV	50S ribosomal protein L22
85	Mmyc	NP_975716	rplV	50S ribosomal protein L22
85	Pthe	YP_001210875	RplV	ribosomal protein L22
86	Bsub	NP_388003	rpsC	30S ribosomal protein S3
86	CaPastA	YP_456712	rpsC	30S ribosomal protein S3
86	CaPastO	NP_950458	rpsC	30S ribosomal protein S3
86	CaPaus	YP_001799166	rpsC	30S ribosomal protein S3
86	CaPmal	YP_002004378	rpsC	30S ribosomal protein S3
86	Cklu	YP_001393632	rpsC	30S ribosomal protein S3
86	Lpla	NP_784730	rpsC	30S ribosomal protein S3
86	Maga	YP_003515764	rpsC	30S ribosomal protein S3
86	Mgen	NP_072820	rpsC	30S ribosomal protein S3
86	Mmob	YP_015938	rpsC	30S ribosomal protein S3
86	Mmyc	NP_975715	rpsC	30S ribosomal protein S3
86	Pthe	YP_001210876	rpsC	30S ribosomal protein S3
87	Bsub	NP_388004	rplP	50S ribosomal protein L16
87	CaPastA	YP_456711	rplP	50S ribosomal protein L16
87	CaPastO	NP_950459	rplP	50S ribosomal protein L16
87	CaPaus	YP_001799165	rplP	50S ribosomal protein L16
87	CaPmal	YP_002004379	rplP	50S ribosomal protein L16
87	Cklu	YP_001393633	rplP	50S ribosomal protein L16
87	Lpla	NP_784731	rplP	50S ribosomal protein L16
87	Maga	YP_003515763	rplP	50S ribosomal protein L16
87	Mgen	NP_072821	rplP	50S ribosomal protein L16
87	Mmob	YP_015939	rplP	50S ribosomal protein L16
87	Mmyc	NP_975714	rplP	50S ribosomal protein L16
87	Pthe	YP_001210877	rplP	50S ribosomal protein L16
88	Bsub	NP_388006	rpsQ	30S ribosomal protein S17
88	CaPastA	YP_456709	rpsQ	30S ribosomal protein S17
88	CaPastO	NP_950461	rpsQ	30S ribosomal protein S17
88	CaPaus	YP_001799163	rpsQ	30S ribosomal protein S17
88	CaPmal	YP_002004381	rpsQ	30S ribosomal protein S17
88	Cklu	YP_001393635	rpsQ	30S ribosomal protein S17
88	Lpla	NP_784733	rpsQ	30S ribosomal protein S17
88	Maga	YP_003515761	rpsQ	30S ribosomal protein S17
88	Mgen	NP_072823	rpsQ	30S ribosomal protein S17
88	Mmob	YP_015941	rpsQ	30S ribosomal protein S17
88	Mmyc	NP_975712	rpsQ	30S ribosomal protein S17
88	Pthe	YP_001210879	RpsQ	ribosomal protein S17
89	Bsub	NP_388007	rplN	50S ribosomal protein L14
89	CaPastA	YP_456708	rplN	50S ribosomal protein L14
89	CaPastO	NP_950462	rplN	50S ribosomal protein L14
89	CaPaus	YP_001799162	rplN	50S ribosomal protein L14
89	CaPmal	YP_002004382	rplN	50S ribosomal protein L14
89	Cklu	YP_001393636	rplN	50S ribosomal protein L14
89	Lpla	NP_784734	rplN	ribosomal protein L14
89	Maga	YP_003515760	rplN	50S ribosomal protein L14
89	Mgen	NP_072824	rplN	50S ribosomal protein L14
89	Mmob	YP_015942	rplN	50S ribosomal protein L14
89	Mmyc	NP_975711	rplN	50S ribosomal protein L14
89	Pthe	YP_001210880	rplN	50S ribosomal protein L14
90	Bsub	NP_388009	rplE	50S ribosomal protein L5
90	CaPastA	YP_456706	rplE	50S ribosomal protein L5
90	CaPastO	NP_950464	rplE	50S ribosomal protein L5
90	CaPaus	YP_001799160	rplE	50S ribosomal protein L5
90	CaPmal	YP_002004384	rplE	50S ribosomal protein L5
90	Cklu	YP_001393638	rplE	50S ribosomal protein L5
90	Lpla	NP_784736	rplE	50S ribosomal protein L5
90	Maga	YP_003515758	rplE	50S ribosomal protein L5
90	Mgen	NP_072826	rplE	50S ribosomal protein L5
90	Mmob	YP_015944	rplE	50S ribosomal protein L5
90	Mmyc	NP_975708	rplE	50S ribosomal protein L5
90	Pthe	YP_001210882	rplE	50S ribosomal protein L5
91	Bsub	NP_388011	rpsH	30S ribosomal protein S8
91	CaPastA	YP_456704	rpsH	30S ribosomal protein S8
91	CaPastO	NP_950466	rpsH	30S ribosomal protein S8
91	CaPaus	YP_001799158	rpsH	30S ribosomal protein S8
91	CaPmal	YP_002004386	rpsH	30S ribosomal protein S8
91	Cklu	YP_001393640	rpsH	30S ribosomal protein S8
91	Lpla	NP_784738	rpsH	30S ribosomal protein S8
91	Maga	YP_003515756	rpsH	30S ribosomal protein S8
91	Mgen	NP_072828	rpsH	30S ribosomal protein S8
91	Mmob	YP_015946	rpsH	30S ribosomal protein S8
91	Mmyc	NP_975707	rpsH	30S ribosomal protein S8
91	Pthe	YP_001210883	rpsH	30S ribosomal protein S8
92	Bsub	NP_388012	rplF	50S ribosomal protein L6
92	CaPastA	YP_456703	rplF	50S ribosomal protein L6
92	CaPastO	NP_950467	rplF	50S ribosomal protein L6
92	CaPaus	YP_001799157	rplF	50S ribosomal protein L6
92	CaPmal	YP_002004387	rplF	50S ribosomal protein L6
92	Cklu	YP_001393641	rplF	50S ribosomal protein L6
92	Lpla	NP_784739	rplF	50S ribosomal protein L6
92	Maga	YP_003515755	rplF	50S ribosomal protein L6
92	Mgen	NP_072829	rplF	50S ribosomal protein L6
92	Mmob	YP_015947	rplF	50S ribosomal protein L6
92	Mmyc	NP_975706	rplF	50S ribosomal protein L6
92	Pthe	YP_001210884	RplF	ribosomal protein L6P/L9E
93	Bsub	NP_388013	rplR	50S ribosomal protein L18
93	CaPastA	YP_456702	rplR	50S ribosomal protein L18
93	CaPastO	NP_950468	rplR	50S ribosomal protein L18
93	CaPaus	YP_001799156	rplR	50S ribosomal protein L18
93	CaPmal	YP_002004388	rplR	50S ribosomal protein L18
93	Cklu	YP_001393642	rplR	50S ribosomal protein L18
93	Lpla	NP_784740	rplR	ribosomal protein L18
93	Maga	YP_003515754	rplR	50S ribosomal protein L18
93	Mgen	NP_072830	rplR	50S ribosomal protein L18
93	Mmob	YP_015948	rplR	50S ribosomal protein L18
93	Mmyc	NP_975705	rplR	50S ribosomal protein L18
93	Pthe	YP_001210885	rplR	50S ribosomal protein L18
94	Bsub	NP_388014	rpsE	30S ribosomal protein S5
94	CaPastA	YP_456701	rpsE	30S ribosomal protein S5
94	CaPastO	NP_950469	rpsE	30S ribosomal protein S5
94	CaPaus	YP_001799155	rpsE	30S ribosomal protein S5
94	CaPmal	YP_002004389	rpsE	30S ribosomal protein S5
94	Cklu	YP_001393643	rpsE	30S ribosomal protein S5
94	Lpla	NP_784741	rpsE	30S ribosomal protein S5
94	Maga	YP_003515753	rpsE	30S ribosomal protein S5
94	Mgen	NP_072831	rpsE	30S ribosomal protein S5
94	Mmob	YP_015949	rpsE	30S ribosomal protein S5
94	Mmyc	NP_975704	rpsE	30S ribosomal protein S5
94	Pthe	YP_001210886	rpsE	30S ribosomal protein S5
95	Bsub	NP_388016	rplO	50S ribosomal protein L15
95	CaPastA	YP_456699	rplO	50S ribosomal protein L15
95	CaPastO	NP_950471	rplO	50S ribosomal protein L15
95	CaPaus	YP_001799153	rplO	50S ribosomal protein L15
95	CaPmal	YP_002004391	rplO	50S ribosomal protein L15
95	Cklu	YP_001393645	rplO	50S ribosomal protein L15
95	Lpla	NP_784743	rplO	ribosomal protein L15
95	Maga	YP_003515752	rplO	50S ribosomal protein L15
95	Mgen	NP_072832	rplO	50S ribosomal protein L15
95	Mmob	YP_015950	rplO	50S ribosomal protein L15
95	Mmyc	NP_975703	rplO	50S ribosomal protein L15
95	Pthe	YP_001210889	rplO	50S ribosomal protein L15
96	Bsub	NP_388017	secY	preprotein translocase subunit SecY
96	CaPastA	YP_456698	secY	preprotein translocase subunit SecY
96	CaPastO	NP_950472	secY	preprotein translocase subunit SecY
96	CaPaus	YP_001799152	secY	preprotein translocase subunit SecY
96	CaPmal	YP_002004392	secY	preprotein translocase subunit SecY
96	Cklu	YP_001393646	secY	preprotein translocase subunit SecY
96	Lpla	NP_784744	secY	preprotein translocase subunit SecY
96	Maga	YP_003515739	secY	preprotein translocase SecY subunit
96	Mgen	NP_072833	secY	preprotein translocase subunit SecY
96	Mmob	YP_015951	secY	preprotein translocase subunit SecY
96	Mmyc	NP_975702	secY	preprotein translocase subunit SecY
96	Pthe	YP_001210890	secY	preprotein translocase subunit SecY
97	Bsub	NP_388022	rpsM	30S ribosomal protein S13
97	CaPastA	YP_456693	rpsM	30S ribosomal protein S13
97	CaPastO	NP_950477	rpsM	30S ribosomal protein S13
97	CaPaus	YP_001799147	rpsM	30S ribosomal protein S13
97	CaPmal	YP_002004396	rpsM	30S ribosomal protein S13
97	Cklu	YP_001393651	rpsM	30S ribosomal protein S13
97	Lpla	NP_784748	rpsM	30S ribosomal protein S13
97	Maga	YP_003515735	rpsM	30S ribosomal protein S13
97	Mgen	NP_072838	rpsM	30S ribosomal protein S13
97	Mmob	YP_015956	rpsM	30S ribosomal protein S13
97	Mmyc	NP_975699	rpsM	30S ribosomal protein S13
97	Pthe	YP_001210895	rpsM	30S ribosomal protein S13
98	Bsub	NP_388023	rpsK	30S ribosomal protein S11
98	CaPastA	YP_456692	rpsK	30S ribosomal protein S11
98	CaPastO	NP_950478	rpsK	30S ribosomal protein S11
98	CaPaus	YP_001799146	rpsK	30S ribosomal protein S11
98	CaPmal	YP_002004397	rpsK	30S ribosomal protein S11
98	Cklu	YP_001393652	rpsK	30S ribosomal protein S11
98	Lpla	NP_784749	rpsK	30S ribosomal protein S11
98	Maga	YP_003515734	rpsK	30S ribosomal protein S11
98	Mgen	NP_072839	rpS11	30S ribosomal protein S11
98	Mmob	YP_015957	rpsK	30S ribosomal protein S11
98	Mmyc	NP_975698	rpsK	30S ribosomal protein S11
98	Pthe	YP_001210896	RpsK	30S ribosomal protein S11
99	Bsub	NP_388024	rpoA	DNA-directed RNA polymerase subunit alpha
99	CaPastA	YP_456691	rpoA	DNA-directed RNA polymerase subunit alpha
99	CaPastO	NP_950479	rpoA	DNA-directed RNA polymerase alpha subunit
99	CaPaus	YP_001799145	rpoA	DNA-directed RNA polymerase subunit alpha
99	CaPmal	YP_002004398	rpoA	DNA-directed RNA polymerase, alpha chain
99	Cklu	YP_001393654	rpoA	DNA-directed RNA polymerase subunit alpha
99	Lpla	NP_784750	rpoA	DNA-directed RNA polymerase subunit alpha
99	Maga	YP_003515733	rpoA	DNA directed RNA polymerase subunit alpha (RNAPsubunit alpha) (Transcriptase subunit alpha) (RNApolymerase subunit alpha)
99	Mgen	NP_072840	rpoA	DNA-directed RNA polymerase subunit alpha
99	Mmob	YP_015958	rpoA	DNA-directed RNA polymerase subunit alpha
99	Mmyc	NP_975697	rpoA	DNA-directed RNA polymerase subunit alpha
99	Pthe	YP_001210899	RpoA	DNA-directed RNA polymerase subunit alpha
100	Bsub	NP_388025	rplQ	50S ribosomal protein L17
100	CaPastA	YP_456690	rplQ	50S ribosomal protein L17
100	CaPastO	NP_950480	rplQ	50S ribosomal protein L17
100	CaPaus	YP_001799144	rplQ	50S ribosomal protein L17
100	CaPmal	YP_002004399	rplQ	50S ribosomal protein L17
100	Cklu	YP_001393655	rplQ	50S ribosomal protein L17
100	Lpla	NP_784751	rplQ	ribosomal protein L17
100	Maga	YP_003515732	rplQ	50S ribosomal protein L17
100	Mgen	NP_072841	rplQ	50S ribosomal protein L17
100	Mmob	YP_015959	rplQ	50S ribosomal protein L17
100	Mmyc	NP_975696	rplQ	50S ribosomal protein L17
100	Pthe	YP_001210900	rplQ	50S ribosomal protein L17
101	Bsub	NP_388028	ybaF	permease
101	CaPastA	YP_456735	cbiQ	ABC-type cobalt transport protein CbiQ
101	CaPastO	NP_950432	cbiQ	ABC-type cobalt transport system, permease component
101	CaPaus	YP_001798851	cbiQ	ABC-type cobalt transport system,permease component
101	CaPmal	YP_002004402	cbiQ	ABC-type cobalt transport system, permease component
101	Cklu	YP_001393658	NA	transporter protein
101	Lpla	NP_784761	NA	ABC transporter, permease protein
101	Maga	YP_003515729	NA	ABC transporter permease
101	Mgen	NP_072844	NA	metal ion ABC transporter permease
101	Mmob	YP_016128	cbiQ	putative cobalt ABC transporter permease protein
101	Mmyc	NP_975693	abc	ABC transporter, permease component
101	Pthe	YP_001210904	CbiQ	ABC-type cobalt transport system, permease component CbiQ and related transporters
102	Bsub	NP_390742	pheS	phenylalanyl-tRNA synthetase subunit alpha
102	CaPastA	YP_456329	pheS	phenylalanyl-tRNA synthetase subunit alpha
102	CaPastO	NP_950848	pheS	phenylalanyl-tRNA synthetase subunit alpha
102	CaPaus	YP_001799117	pheS	phenylalanyl-tRNA synthetase subunit alpha
102	CaPmal	YP_002004120	pheS	phenylalanyl-tRNA synthetase subunit alpha
102	Cklu	YP_001396571	pheS	phenylalanyl-tRNA synthetase subunit alpha
102	Lpla	NP_785157	pheS	phenylalanyl-tRNA synthetase subunit alpha
102	Maga	YP_003515261	pheS	phenylalanyl tRNA synthetase
102	Mgen	NP_072856	pheS	phenylalanyl-tRNA synthetase subunit alpha
102	Mmob	YP_016014	pheS	phenylalanyl-tRNA synthetase subunit alpha
102	Mmyc	NP_975577	pheS	phenylalanyl-tRNA synthetase subunit alpha
102	Pthe	YP_001212500	pheS	phenylalanyl-tRNA synthetase subunit alpha
103	Bsub	NP_390741	pheT	phenylalanyl-tRNA synthetase subunit beta
103	CaPastA	YP_456330	pheT	phenylalanyl-tRNA synthetase subunit beta
103	CaPastO	NP_950850	pheT	phenylalanyl-tRNA synthetase beta subunit
103	CaPaus	YP_001799116	pheT	Phenylalanyl-tRNA synthetase beta-chain
103	CaPmal	YP_002004119	pheT	Phenylalanyl-tRNA synthetase beta chain
103	Cklu	YP_001396570	pheT	phenylalanyl-tRNA synthetase subunit beta
103	Lpla	NP_785158	pheT	phenylalanyl-tRNA synthetase subunit beta
103	Maga	YP_003515263	pheT	phenylalanyl tRNA synthetase
103	Mgen	NP_072857	pheT	phenylalanyl-tRNA synthetase subunit beta
103	Mmob	YP_016213	pheT	phenylalanyl-tRNA synthetase subunit beta
103	Mmyc	NP_975576	pheT	phenylalanyl-tRNA synthetase subunit beta
103	Pthe	YP_001212499	PheT	phenylalanyl-tRNA synthetase beta subunit
104	Bsub	NP_390765	infC	translation initiation factor IF-3
104	CaPastA	YP_456858	infC	protein translation initiation factor 3
104	CaPastO	NP_950996	infC	translation initiation factor IF3
104	CaPaus	YP_001798778	infC	Translation initiation factor IF3
104	CaPmal	YP_002004469	infC	Translation initiation factor IF3
104	Cklu	YP_001394994	infC	hypothetical protein
104	Lpla	NP_785121	infC	translation initiation factor IF-3
104	Maga	YP_003515686	infC	translation initiation factor IF 3
104	Mgen	NP_072858	infC	translation initiation factor IF-3
104	Mmob	YP_016326	infC	translation initiation factor IF-3
104	Mmyc	NP_975222	infC	translation initiation factor IF-3
104	Pthe	YP_001212505	InfC	translation initiation factor 3
105	Bsub	NP_390763	rplT	50S ribosomal protein L20
105	CaPastA	YP_456856	rplT	50S ribosomal protein L20/unknown domain fusion protein
105	CaPastO	NP_950994	rplT	50S ribosomal protein L20/unknown domain fusion protein
105	CaPaus	YP_001798780	rplT	50S ribosomal protein L20/unknown domain fusion protein
105	CaPmal	YP_002004471	rplT	50S ribosomal protein L20/unknown domain fusion protein
105	Cklu	YP_001396573	rplT	50S ribosomal protein L20
105	Lpla	NP_785123	rplT	50S ribosomal protein L20
105	Maga	YP_003515688	rplT	50S ribosomal protein L20
105	Mgen	NP_072860	rplT	50S ribosomal protein L20
105	Mmob	YP_016324	rplT	50S ribosomal protein L20
105	Mmyc	NP_975224	rplT	50S ribosomal protein L20
105	Pthe	YP_001212503	rplT	50S ribosomal protein L20
106	Bsub	NP_390427	hrcA	heat-inducible transcription repressor
106	CaPastA	YP_456255	hrcA	heat-inducible transcription repressor
106	CaPastO	NP_950958	hrcA	heat-inducible transcription repressor
106	CaPaus	YP_001799142	hrcA	Heat-inducible transcription repressor HrcA
106	CaPmal	YP_002004241	hrcA	Heat-inducible transcription repressor
106	Cklu	YP_001394299	hrcA	heat-inducible transcription repressor
106	Lpla	NP_785554	hrcA	heat-inducible transcription repressor
106	Maga	YP_003515783	hrcA	heat inducible transcription repressor hrcA
106	Mgen	NP_072867	hrcA	heat-inducible transcription repressor
106	Mmob	YP_015808	hrcA	heat-inducible transcription repressor
106	Mmyc	NP_975592	hrcA	heat-inducible transcription repressor HrcA
106	Pthe	YP_001211425	HrcA	transcriptional regulator of heat shock gene
107	Bsub	NP_389429	rluD	pseudouridylate synthase
107	CaPastA	YP_456786	rluA	ribosomal large subunit pseudouridine synthase D
107	CaPastO	NP_950383	rluA	pseudouridylate synthase
107	CaPaus	YP_001799075	rluA	Pseudouridine synthase
107	CaPmal	YP_002004307	rluA	Pseudouridine synthase
107	Cklu	YP_001394589	NA	pseudouridine synthase
107	Lpla	NP_785347	rluD1	pseudouridylate synthase
107	Maga	YP_003515926	NA	ribosomal large subunit pseudouridine synthase D
107	Mgen	NP_072871	NA	RluA family pseudouridine synthase
107	Mmob	YP_016023	rluD	ribosomal large subunit pseudouridine synthase D
107	Mmyc	NP_975564	rluD	ribosomal large subunit pseudouridylate synthase D
107	Pthe	YP_001212368	RluA	pseudouridylate synthase
108	Bsub	NP_389397	mraW	S-adenosyl-methyltransferase MraW
108	CaPastA	YP_456848	NA	hypothetical protein
108	CaPastO	NP_950987	mraW	S-adenosyl-methyltransferase MraW
108	CaPaus	YP_001798786	mraW	S-adenosyl-methyltransferase MraW
108	CaPmal	YP_002004477	mraW	S-adenosyl-methyltransferase MraW
108	Cklu	YP_001394571	mraW	S-adenosyl-methyltransferase MraW
108	Lpla	NP_785697	mraW	S-adenosyl-methyltransferase MraW
108	Maga	YP_003515589	mraW	S adenosyl methyltransferase
108	Mgen	NP_072888	mraW	S-adenosyl-methyltransferase MraW
108	Mmob	YP_016077	mraW	S-adenosylmethionine-dependent methyltransferase
108	Mmyc	NP_975572	mraW	S-adenosyl-methyltransferase MraW
108	Pthe	YP_001212419	mraW	S-adenosyl-methyltransferase MraW
109	Bsub	NP_390674	rplU	50S ribosomal protein L21
109	CaPastA	YP_456825	rplU	50S ribosomal protein L21
109	CaPastO	NP_950338	rplU	50S ribosomal protein L21
109	CaPaus	YP_001799179	rplU	50S ribosomal protein L21
109	CaPmal	YP_002004317	rplU	50S ribosomal protein L21
109	Cklu	YP_001394278	rplU	50S ribosomal protein L21
109	Lpla	NP_785185	rplU	50S ribosomal protein L21
109	Maga	YP_003515779	rplU	50S ribosomal protein L21
109	Mgen	NP_072898	rplU	50S ribosomal protein L21
109	Mmob	YP_016001	rplU	50S ribosomal protein L21
109	Mmyc	NP_975546	rplU	50S ribosomal protein L21
109	Pthe	YP_001211380	rplU	50S ribosomal protein L21
110	Bsub	NP_390672	rpmA	50S ribosomal protein L27
110	CaPastA	YP_456823	rpmA	50S ribosomal protein L27
110	CaPastO	NP_950340	rpmA	50S ribosomal protein L27
110	CaPaus	YP_001799177	rpmA	50S ribosomal protein L27
110	CaPmal	YP_002004315	rpmA	50S ribosomal protein L27
110	Cklu	YP_001394280	rpmA	50S ribosomal protein L27
110	Lpla	NP_785187	rpmA	50S ribosomal protein L27
110	Maga	YP_003515778	rpmA	50S ribosomal protein L27
110	Mgen	NP_072900	rpmA	50S ribosomal protein L27
110	Mmob	YP_016002	rpmA	50S ribosomal protein L27
110	Mmyc	NP_975544	rpmA	50S ribosomal protein L27
110	Pthe	YP_001211381	rpmA	50S ribosomal protein L27
111	Bsub	NP_390701	tig	trigger factor
111	CaPastA	YP_456530	tig	trigger factor, PPIase
111	CaPastO	NP_950701	tig	FKBP-type peptidyl-prolyl cis-trans isomerase
111	CaPaus	YP_001799275	tig	Trigger factor (TF)
111	CaPmal	YP_002004330	tig	Trigger factor (TF)
111	Cklu	YP_001396726	tig	trigger factor
111	Lpla	NP_785631	tig	trigger factor
111	Maga	YP_003515349	tig	trigger factor
111	Mgen	NP_072904	tig	trigger factor
111	Mmob	YP_015782	tig	trigger factor
111	Mmyc	NP_975439	NA	FKBP-type peptidyl-prolyl isomerase
111	Pthe	YP_001211353	tig	trigger factor
112	Bsub	NP_388543	pcrA	ATP-dependent DNA helicase
112	CaPastA	YP_456311	uvrD	UvrD helicase
112	CaPastO	NP_950873	uvrD	ATP-dependent DNA helicase
112	CaPaus	YP_001799268	uvrD	ATP-dependent DNA helicase
112	CaPmal	YP_002004462	uvrD	ATP-dependent DNA helicase
112	Cklu	YP_001396846	pcrA	PcrA
112	Lpla	NP_784814	pcrA	ATP-dependent DNA helicase PcrA
112	Maga	YP_003515509	pcrA	ATP dependent helicase
112	Mgen	NP_072909	NA	UvrD/REP helicase
112	Mmob	YP_016186	pcrA1	ATP-dependent DNA helicase
112	Mmyc	NP_975745	pcrA	ATP-dependent DNA helicase
112	Pthe	YP_001213079	UvrD	superfamily I DNA/RNA helicase
113	Bsub	NP_390399	sigA	RNA polymerase sigma factor RpoD
113	CaPastA	YP_456303	rpoD	RNA polymerase sigma factor RpoD
113	CaPastO	NP_950880	rpoD	DNA-directed RNA polymerase sigma subunit
113	CaPaus	YP_001799198	rpoD	RNA polymerase sigma factor
113	CaPmal	YP_002004339	rpoD	probable RNA polymerase sigma factor RpoD
113	Cklu	YP_001394341	rpoD2	hypothetical protein
113	Lpla	NP_785497	rpoD	RNA polymerase sigma factor RpoD
113	Maga	YP_003515450	rpoD	DNA directed RNA polymerase sigma factor
113	Mgen	NP_072914	rpoD	RNA polymerase sigma factor
113	Mmob	YP_015986	rpoD	RNA polymerase sigma factor
113	Mmyc	NP_975452	rpoD	RNA polymerase sigma-A factor
113	Pthe	YP_001211457	RpoD	RNA polymerase sigma factor RpoD
114	Bsub	NP_390400	dnaG	DNA primase
114	CaPastA	YP_456304	dnaG	DNA primase
114	CaPastO	NP_950879	dnaG	DNA primase
114	CaPaus	YP_001799199	dnaG	DNA primase
114	CaPmal	YP_002004338	dnaG1	DNA primase
114	Cklu	YP_001394340	dnaG	DNA primase
114	Lpla	NP_785498	dnaG	DNA primase DnaG
114	Maga	YP_003515451	dnaG	DNA primase
114	Mgen	NP_072915	dnaE	DNA primase
114	Mmob	YP_015988	dnaG	DNA primase
114	Mmyc	NP_975451	dnaG	DNA primase
114	Pthe	YP_001211456	DnaG	DNA primase
115	Bsub	NP_387975	cysS	cysteinyl-tRNA synthetase
115	CaPastA	YP_456775	cysS	cysteinyl-tRNA synthetase
115	CaPastO	NP_950393	cysS	cysteinyl-tRNA synthetase
115	CaPaus	YP_001799085	cysS	Cysteinyl-tRNA synthetase
115	CaPmal	YP_002004368	cysS	Cysteinyl-tRNA synthetase
115	Cklu	YP_001393605	cysS	cysteinyl-tRNA synthetase
115	Lpla	NP_784378	cysS	cysteinyl-tRNA synthetase
115	Maga	YP_003515233	cysS	cysteinyl tRNA synthetase
115	Mgen	NP_072918	cysS	cysteinyl-tRNA synthetase
115	Mmob	YP_015845	cysS	cysteinyl-tRNA synthetase
115	Mmyc	NP_975926	cysS	cysteinyl-tRNA synthetase
115	Pthe	YP_001210845	cysS	cysteinyl-tRNA synthetase
116	Bsub	NP_388544	ligA	NAD-dependent DNA ligase LigA
116	CaPastA	YP_456517	lig	NAD-dependent DNA ligase
116	CaPastO	NP_950690	lig	NAD-dependent DNA ligase
116	CaPaus	YP_001799329	ligA	NAD-dependent DNA ligase
116	CaPmal	YP_002004308	lig	NAD-dependent DNA ligase
116	Cklu	YP_001396844	ligA1	LigA1
116	Lpla	NP_784815	ligA	DNA ligase (NAD+)
116	Maga	YP_003515467	ligA	DNA ligase
116	Mgen	NP_072919	NA	DNA ligase, NAD-dependent
116	Mmob	YP_015892	lig	NAD(+)-dependent DNA ligase
116	Mmyc	NP_975740	ligA	DNA ligase
116	Pthe	YP_001213077	Lig	NAD-dependent DNA ligase
117	Bsub	NP_391582	prfA	peptide chain release factor 1
117	CaPastA	YP_456204	prfA	peptide chain release factor 1
117	CaPastO	NP_950266	prfA	protein chain release factor A
117	CaPaus	YP_001798825	prfA	Protein chain release factor A
117	CaPmal	YP_002004212	prfA	peptide chain release factor 1
117	Cklu	YP_001397064	prfA	peptide chain release factor 1
117	Lpla	NP_785842	prfA	peptide chain release factor 1
117	Maga	YP_003516002	prfA	peptide chain release factor 1
117	Mgen	NP_072924	prfA	peptide chain release factor 1
117	Mmob	YP_015887	prfA	peptide chain release factor 1
117	Mmyc	NP_975153	prfA	peptide chain release factor 1
117	Pthe	YP_001213380	PrfA	protein chain release factor A
118	Bsub	NP_390801	dnaE	DNA polymerase III DnaE
118	CaPastA	YP_456325	dnaE	DNA polymerase III alpha subunit
118	CaPastO	NP_950843	dnaE	DNA polymerase III alpha subunit
118	CaPaus	YP_001799120	dnaE	DNA polymerase III alpha subunit
118	CaPmal	YP_002004137	dnaE	DNA polymerase III, alpha subunit
118	Cklu	YP_001396922	dnaE	DNA polymerase III DnaE
118	Lpla	NP_785442	dnaE	DNA-directed DNA polymerase III, alpha chain
118	Maga	YP_003515356	dnaE	DNA polymerase III subunit alpha
118	Mgen	NP_072927	polC-2	DNA polymerase III subunit alpha
118	Mmob	YP_016184	dnaE	DNA polymerase III DnaE
118	Mmyc	NP_975661	dnaE	DNA polymerase III alpha chain
118	Pthe	YP_001212770	dnaE	DNA polymerase III DnaE
119	Bsub	NP_390910	leuS	leucyl-tRNA synthetase
119	CaPastA	YP_456852	leuS	leucyl-tRNA synthetase
119	CaPastO	NP_950990	leuS	leucyl-tRNA synthetase
119	CaPaus	YP_001798783	leuS	leucyl-tRNA synthetase
119	CaPmal	YP_002004474	leuS	leucyl-tRNA synthetase
119	Cklu	YP_001396966	leuS	leucyl-tRNA synthetase
119	Lpla	NP_784958	leuS	leucyl-tRNA synthetase
119	Maga	YP_003515579	leuS	leucyl tRNA synthetase
119	Mgen	NP_072933	leuS	leucyl-tRNA synthetase
119	Mmob	YP_016236	leuS	leucyl-tRNA synthetase
119	Mmyc	NP_975686	leuS	leucyl-tRNA synthetase
119	Pthe	YP_001211389	leuS	leucyl-tRNA synthetase
120	Bsub	NP_388906	yhfJ	lipoate-protein ligase
120	CaPastA	YP_456608	lplA	lipoate-protein ligase A
120	CaPastO	NP_950561	lplA	lipoate-protein ligase A
120	CaPaus	YP_001799122	lplA	Lipoate-protein ligase A
120	CaPmal	YP_002004245	lplA	Lipoate-protein ligase A
120	Cklu	YP_001395160	lplA	hypothetical protein
120	Lpla	NP_786049	lplA1	lipoate-protein ligase
120	Lpla	NP_786118	lplA2	lipoate-protein ligase
120	Maga	YP_003515255	lplA	lipoate protein ligase A
120	Mgen	NP_072937	lplA	lipoyltransferase/lipoate-protein ligase
120	Mmob	YP_015755	lplA	lipoate-protein ligase
120	Mmyc	NP_975263	lplA	lipoate protein ligase
121	Bsub	NP_388687	acoA	acetoin dehydrogenase E1 component (TPP-dependent alpha subunit)
121	Bsub	NP_389341	pdhA	pyruvate dehydrogenase (E1 alpha subunit)
121	CaPastA	YP_456332	acoA	pyruvate dehydrogenase E1 component alpha subunit
121	CaPastO	NP_950852	acoA	thiamine pyrophosphate-dependent dehydrogenase, E1 component alpha subunit
121	CaPaus	YP_001799261	pdhA	Pyruvate dehydrogenase E1 component,alpha subunit
121	CaPmal	YP_002004196	acoA	Thiamine pyrophosphate-dependent dehydrogenase, E1 component (alpha subunit)
121	Cklu	YP_001395654	pdhA	PdhA
121	Lpla	NP_785659	pdhA	pyruvate dehydrogenase complex, E1 component, alpha subunit
121	Maga	YP_003515289	pdhA	pyruvate dehydrogenase E1 component, subunit alpha
121	Mgen	NP_072941	pdhA	pyruvate dehydrogenase component E1, alpha subunit
121	Mmob	YP_016281	pdhA	pyruvate dehydrogenase E1 component alpha subunit
121	Mmyc	NP_975264	pdhA	pyruvate dehydrogenase (lipoamide), alpha chain
122	Bsub	NP_390618	alaS	alanyl-tRNA synthetase
122	CaPastA	YP_456612	alaS	alanyl-tRNA synthetase
122	CaPastO	NP_950557	alaS	alanyl-tRNA synthetase
122	CaPaus	YP_001799095	alaS	alanyl-tRNA synthetase
122	CaPmal	YP_002004282	alaS	alanyl-tRNA synthetase
122	Cklu	YP_001394714	alaS	alanyl-tRNA synthetase
122	Lpla	NP_785763	alaS	alanyl-tRNA synthetase
122	Maga	YP_003515608	alaS	alanyl tRNA synthetase
122	Mgen	NP_072959	alaS	alanyl-tRNA synthetase
122	Mmob	YP_016136	alaS	alanyl-tRNA synthetase
122	Mmyc	NP_975181	alaS	alanyl-tRNA synthetase
122	Pthe	YP_001211610	AlaS	alanyl-tRNA synthetase
123	Bsub	NP_390627	mnmA	tRNA-specific 2-thiouridylase MnmA
123	CaPastA	YP_456793	mnmA	tRNA-specific 2-thiouridylase MnmA
123	CaPastO	NP_950377	mnmA	tRNA-specific 2-thiouridylase MnmA
123	CaPaus	YP_001799325	mnmA	tRNA-specific 2-thiouridylase MnmA
123	CaPmal	YP_002004219	mnmA	tRNA-specific 2-thiouridylase MnmA
123	Cklu	YP_001394478	mnmA	tRNA-specific 2-thiouridylase MnmA
123	Lpla	NP_785677	mnmA	tRNA-specific 2-thiouridylase MnmA
123	Maga	YP_003515609	trmU	tRNA(5 methylaminomethyl 2 thiouridylate) methyltransferase
123	Mgen	NP_072962	mnmA	tRNA-specific 2-thiouridylase MnmA
123	Mmob	YP_016137	mnmA	tRNA-specific 2-thiouridylase MnmA
123	Mmyc	NP_975433	mnmA	tRNA-specific 2-thiouridylase MnmA
123	Pthe	YP_001211606	mnmA	tRNA-specific 2-thiouridylase MnmA
124	Bsub	NP_389477	ftsY	signal recognition particle (docking protein)
124	CaPastA	YP_456260	ftsY	signal recognition particle, docking protein FtsY
124	CaPastO	NP_950931	ftsY	signal recognition particle-docking protein FtsY
124	CaPaus	YP_001799381	ftsY	Signal recognition particle-docking protein
124	CaPmal	YP_002004114	ftsY	Signal recognition particle-docking protein
124	Cklu	YP_001394789	ftsY	hypothetical protein
124	Lpla	NP_785223	ftsY	signal recognition particle receptor FtsY
124	Maga	YP_003515390	ftsY	cell division protein FtsY
124	Mgen	NP_072964	ftsY	signal recognition particle-docking protein FtsY
124	Mmob	YP_015835	ftsY	cell division protein ftsY
124	Mmyc	NP_975475	ftsY	cell division protein FtsY
124	Pthe	YP_001212287	FtsY	signal recognition particle GTPase
125	Bsub	NP_390425	dnaK	molecular chaperone DnaK
125	CaPastA	YP_456257	dnaK	molecular chaperone DnaK
125	CaPastO	NP_950956	dnaK	molecular chaperone DnaK
125	CaPaus	YP_001799140	dnaK	molecular chaperone DnaK
125	CaPmal	YP_002004243	dnaK	molecular chaperone DnaK
125	Cklu	YP_001394301	dnaK	molecular chaperone DnaK
125	Lpla	NP_785552	dnaK	molecular chaperone DnaK
125	Maga	YP_003515339	dnaK	chaperone protein dnaK
125	Mgen	NP_072972	dnaK	molecular chaperone DnaK
125	Mmob	YP_015810	dnaK	molecular chaperone DnaK
125	Mmyc	NP_975590	dnaK	molecular chaperone DnaK
125	Pthe	YP_001211428	dnaK	molecular chaperone DnaK
126	Bsub	NP_390844	rpsD	30S ribosomal protein S4
126	CaPastA	YP_456437	rpsD	30S ribosomal protein S4
126	CaPastO	NP_950838	rpsD	30S ribosomal protein S4
126	CaPaus	YP_001798771	rpsD	30S ribosomal protein S4
126	CaPmal	YP_002004343	rpsD	30S ribosomal protein S4
126	Cklu	YP_001393653	rpsD	30S ribosomal protein S4
126	Lpla	NP_785803	rpsD	30S ribosomal protein S4
126	Maga	YP_003515785	rpsD	30S ribosomal protein S4
126	Mgen	NP_072978	rpsD	30S ribosomal protein S4
126	Mmob	YP_015766	rpsD	30S ribosomal protein S4
126	Mmyc	NP_975277	rpsD	30S ribosomal protein S4
126	Pthe	YP_001210898	rpsD	30S ribosomal protein S4
127	Bsub	NP_390165	engA	GTP-binding protein EngA
127	CaPastA	YP_456677	engA	GTP-binding protein EngA
127	CaPastO	NP_950492	engA	GTP-binding protein EngA
127	CaPaus	YP_001799339	engA	GTP-binding protein EngA
127	CaPmal	YP_002004161	engA	GTP-binding protein EngA
127	Cklu	YP_001394746	engA	GTP-binding protein EngA
127	Lpla	NP_785426	engA	GTP-binding protein EngA
127	Maga	YP_003515990	engA	GTP binding protein EngA
127	Mgen	NP_072998	engA	GTP-binding protein EngA
127	Mmob	YP_016180	engA	GTP-binding protein EngA
127	Mmyc	NP_975398	engA	GTP-binding protein EngA
127	Pthe	YP_001212159	engA	GTP-binding protein EngA
128	Bsub	NP_390170	cmk	cytidylate kinase
128	CaPastA	YP_456678	cmk	cytidylate kinase
128	CaPastO	NP_950491	cmk	cytidylate kinase
128	CaPaus	YP_001799340	cmk	Cytidylate kinase
128	CaPmal	YP_002004162	cmk	Cytidylate kinase
128	Cklu	YP_001394956	cmk	cytidylate kinase
128	Lpla	NP_785428	cmk	cytidylate kinase
128	Maga	YP_003515991	cmk	cytidylate kinase
128	Mgen	NP_072999	cmk	cytidylate kinase
128	Mmob	YP_016181	cmk	cytidylate kinase
128	Mmyc	NP_975397	cmk	cytidylate kinase
128	Pthe	YP_001212167	Cmk	cytidylate kinase
129	Bsub	NP_390687	valS	valyl-tRNA synthetase
129	CaPastA	YP_456208	valS	valyl-tRNA synthetase
129	CaPastO	NP_950270	valS	valyl-tRNA synthetase
129	CaPaus	YP_001798820	valS	valyl-tRNA synthetase
129	CaPmal	YP_002004369	valS	Valyl-tRNA synthetase (ValRS)
129	Cklu	YP_001396593	valS	valyl-tRNA synthetase
129	Lpla	NP_785796	valS	valyl-tRNA synthetase
129	Maga	YP_003515330	valS	valyl tRNA synthetase
129	Mgen	NP_073002	valS	valyl-tRNA synthetase
129	Mmob	YP_015855	valS	valyl-tRNA synthetase
129	Mmyc	NP_975302	valS	valyl-tRNA synthetase
129	Pthe	YP_001211362	valS	valyl-tRNA synthetase
130	Bsub	NP_390697	engB	ribosome biogenesis GTP-binding protein YsxC
130	CaPastA	YP_456207	engB	ribosome biogenesis GTP-binding protein YsxC
130	CaPastO	NP_950269	engB	ribosome biogenesis GTP-binding protein YsxC
130	CaPaus	YP_001798821	engB	ribosome biogenesis GTP-binding protein YsxC
130	CaPmal	YP_002004142	engB	ribosome biogenesis GTP-binding protein YsxC
130	Cklu	YP_001396722	engB	ribosome biogenesis GTP-binding protein YsxC
130	Lpla	NP_785629	engB	ribosome biogenesis GTP-binding protein YsxC
130	Maga	YP_003515335	engB	GTP binding protein EngB
130	Mgen	NP_073003	engB	ribosome biogenesis GTP-binding protein YsxC
130	Mmob	YP_016037	engB	ribosome biogenesis GTP-binding protein YsxC
130	Mmyc	NP_975289	engB	ribosome biogenesis GTP-binding protein YsxC
130	Pthe	YP_001211358	engB	ribosome biogenesis GTP-binding protein YsxC
131	Bsub	NP_391148	sufS	cysteine desulfurase
131	CaPastA	YP_456506	csdB	cysteine desulfhydrase
131	CaPastO	NP_950720	csdB	selenocysteine lyase
131	CaPaus	YP_001799130	csdB	Selenocysteine lyase
131	CaPmal	YP_002004153	csdB	Selenocysteine lyase
131	Cklu	YP_001394232	sufS	SufS
131	Lpla	NP_785079	csd1	cysteine desulfurase
131	Maga	YP_003515266	nifS	nitrogen fixation protein NifS
131	Mgen	NP_073006	nifS	aminotransferase, class V
131	Mmob	YP_015776	nifS	aminotransferase protein S-like protein
131	Mmyc	NP_975487	nifS	nitrogen fixation protein class-V pyridoxal-phosph
131	Pthe	YP_001211873	CsdB	selenocysteine lyase
132	Bsub	NP_387989	rpoC	DNA-directed RNA polymerase subunit beta'
132	CaPastA	YP_456656	rpoC	DNA-directed RNA polymerase beta' chain
132	CaPastO	NP_950513	rpoC	DNA-directed RNA polymerase beta' subunit
132	CaPaus	YP_001799239	rpoC	DNA-directed RNA polymerase beta chain
132	CaPmal	YP_002004422	rpoC	DNA-directed RNA polymerase beta\' chain
132	Cklu	YP_001393619	rpoC	DNA-directed RNA polymerase subunit beta'
132	Lpla	NP_784718	rpoC	DNA-directed RNA polymerase subunit beta'
132	Maga	YP_003515841	rpoC	DNA directed RNA polymerase subunit beta'
132	Mgen	NP_073010	rpoC	DNA-directed RNA polymerase subunit beta'
132	Mmob	YP_015979	rpoC	DNA-directed RNA polymerase subunit beta'
132	Mmyc	NP_975974	rpoC	DNA-directed RNA polymerase beta' chain
132	Pthe	YP_001210863	RpoC	DNA-directed RNA polymerase subunit beta'
133	Bsub	NP_387988	rpoB	DNA-directed RNA polymerase subunit beta
133	CaPastA	YP_456657	rpoB	DNA-directed RNA polymerase subunit beta
133	CaPastO	NP_950512	rpoB	DNA-directed RNA polymerase subunit beta
133	CaPaus	YP_001799240	rpoB	DNA-directed RNA polymerase subunit beta
133	CaPmal	YP_002004421	rpoB	DNA-directed RNA polymerase subunit beta
133	Cklu	YP_001393618	rpoB	DNA-directed RNA polymerase subunit beta
133	Lpla	NP_784717	rpoB	DNA-directed RNA polymerase subunit beta
133	Maga	YP_003515842	rpoB	DNA directed RNA polymerase subunit beta
133	Mgen	NP_073011	rpoB	DNA-directed RNA polymerase subunit beta
133	Mmob	YP_015978	rpoB	DNA-directed RNA polymerase subunit beta
133	Mmyc	NP_975973	rpoB	DNA-directed RNA polymerase subunit beta
133	Pthe	YP_001210862	RpoB	DNA-directed RNA polymerase, beta subunit/140 kD subunit
134	Bsub	NP_389426	ileS	isoleucyl-tRNA synthetase
134	CaPastA	YP_456731	ileS	isoleucyl-tRNA synthetase
134	CaPastO	NP_950436	ileS	isoleucyl-tRNA synthetase
134	CaPaus	YP_001798969	ileS	isoleucyl-tRNA synthetase
134	CaPmal	YP_002004286	ileS	isoleucyl-tRNA synthetase
134	Cklu	YP_001397108	ileS	isoleucyl-tRNA synthetase
134	Lpla	NP_785684	ileS	isoleucyl-tRNA synthetase
134	Maga	YP_003515409	ileS	Isoleucyl tRNA synthetase
134	Mgen	NP_073015	ileS	isoleucyl-tRNA synthetase
134	Mmob	YP_016104	ileS	isoleucyl-tRNA synthetase
134	Mmyc	NP_975566	ileS	isoleucyl-tRNA synthetase
134	Pthe	YP_001212370	ileS	isoleucyl-tRNA synthetase
135	Bsub	NP_387985	rplJ	50S ribosomal protein L10
135	CaPastA	YP_456659	rplJ	50S ribosomal protein L10
135	CaPastO	NP_950510	rplJ	50S ribosomal protein L10
135	CaPaus	YP_001799242	rplJ	50S ribosomal protein L10
135	CaPmal	YP_002004419	rplJ	50S ribosomal protein L10
135	Cklu	YP_001393616	rplJ	50S ribosomal protein L10
135	Lpla	NP_784389	rplJ	50S ribosomal protein L10
135	Maga	YP_003515872	rplJ	50S ribosomal protein L10
135	Mgen	NP_073032	rplJ	50S ribosomal protein L10
135	Mmob	YP_016230	rplJ	50S ribosomal protein l10
135	Mmyc	NP_975971	rplJ	50S ribosomal protein L10
135	Pthe	YP_001210858	rplJ	50S ribosomal protein L10
136	Bsub	NP_389475	rnc	ribonuclease III
136	CaPastA	YP_456339	rnc	dsRNA-specific ribonuclease
136	CaPastO	NP_950860	rnc	dsRNA-specific ribonuclease
136	CaPaus	YP_001799214	rnc	DsRNA-specific ribonuclease
136	CaPmal	YP_002004094	rnc	DsRNA-specific ribonuclease
136	Cklu	YP_001394786	rnc	ribonuclease III
136	Lpla	NP_785221	rnc	ribonuclease III
136	Maga	YP_003515628	rnc	ribonuclease III
136	Mgen	NP_073039	rnc	ribonuclease III
136	Mmob	YP_016108	rnc	ribonuclease III
136	Mmyc	NP_975465	rnc	ribonuclease III
136	Pthe	YP_001212288	rnc	ribonuclease III
137	Bsub	NP_389471	plsX	glycerol-3-phosphate acyltransferase PlsX
137	CaPastA	YP_456338	plsX	putative glycerol-3-phosphate acyltransferase PlsX
137	CaPastO	NP_950859	plsX	putative glycerol-3-phosphate acyltransferase PlsX
137	CaPaus	YP_001799215	plsX	putative glycerol-3-phosphate acyltransferase PlsX
137	CaPmal	YP_002004095	plsX	putative glycerol-3-phosphate acyltransferase PlsX
137	Cklu	YP_001394784	NA	glycerol-3-phosphate acyltransferase PlsX
137	Lpla	NP_785219	plsX	putative glycerol-3-phosphate acyltransferase PlsX
137	Maga	YP_003515629	plsX	Fatty acid/phospholipid synthesis protein PlsX
137	Mgen	NP_073040	plsX	glycerol-3-phosphate acyltransferase PlsX
137	Mmob	YP_016109	plsX	putative glycerol-3-phosphate acyltransferase PlsX
137	Mmyc	NP_975466	plsX	putative glycerol-3-phosphate acyltransferase PlsX
137	Pthe	YP_001212296	PlsX	putative glycerol-3-phosphate acyltransferase PlsX
138	Bsub	NP_390670	obgE	GTPase ObgE
138	CaPastA	YP_456822	obgE	GTPase ObgE
138	CaPastO	NP_950341	obgE	GTPase ObgE
138	CaPaus	YP_001799176	obgE	GTPase ObgE
138	CaPmal	YP_002004314	obgE	GTPase ObgE
138	Cklu	YP_001394281	obgE	GTPase ObgE
138	Lpla	NP_785608	obgE	GTPase ObgE
138	Maga	YP_003515721	NA	GTP binding protein
138	Mgen	NP_073056	obgE	GTPase ObgE
138	Mmob	YP_016119	obgE	GTPase ObgE
138	Mmyc	NP_975425	obgE	GTPase ObgE
138	Pthe	YP_001211383	Obg	GTPase
139	Bsub	NP_390407	era	GTP-binding protein Era
139	CaPastA	YP_456306	era	GTP-binding protein Era
139	CaPastO	NP_950877	era	GTP-binding protein Era
139	CaPaus	YP_001799201	era	GTP-binding protein Era
139	CaPmal	YP_002004335	era	GTP-binding protein Era
139	Cklu	YP_001394315	era	GTP-binding protein Era
139	Lpla	NP_785502	era	GTP-binding protein Era
139	Maga	YP_003515312	era	GTP binding protein era
139	Mgen	NP_073060	era	GTP-binding protein Era
139	Mmob	YP_016043	era	GTP-binding protein Era
139	Mmyc	NP_975448	era	GTP-binding protein Era
139	Pthe	YP_001211445	Era	GTPase
140	Bsub	NP_391571	glyA	serine hydroxymethyltransferase
140	CaPastA	YP_456734	glyA	serine hydroxymethyltransferase
140	CaPastO	NP_950433	glyA	serine hydroxymethyltransferase
140	CaPaus	YP_001798850	glyA	serine hydroxymethyltransferase
140	CaPmal	YP_002004182	glyA	serine hydroxymethyltransferase
140	Cklu	YP_001394674	glyA	serine hydroxymethyltransferase
140	Lpla	NP_785839	glyA	glycine hydroxymethyltransferase
140	Maga	YP_003515264	glyA	serine hydroxymethyltransferase
140	Mgen	NP_073067	glyA	serine hydroxymethyltransferase
140	Mmob	YP_016168	glyA	serine hydroxymethyltransferase
140	Mmyc	NP_975863	glyA	serine hydroxymethyltransferase
140	Pthe	YP_001213374	glyA	serine hydroxymethyltransferase
141	Bsub	NP_388031	rpsI	30S ribosomal protein S9
141	CaPastA	YP_456777	rpsI	30S ribosomal protein S9
141	CaPastO	NP_950391	rpsI	30S ribosomal protein S9
141	CaPaus	YP_001799083	rpsI	30S ribosomal protein S9
141	CaPmal	YP_002004366	rpsI	30S ribosomal protein S9
141	Cklu	YP_001393661	rpsI	30S ribosomal protein S9
141	Lpla	NP_784764	rpsI	30S ribosomal protein S9
141	Maga	YP_003515645	rpsI	30S ribosomal protein S9
141	Mgen	NP_073088	rpsI	30S ribosomal protein S9
141	Mmob	YP_015927	rpsI	30S ribosomal protein S9
141	Mmyc	NP_975689	rpsI	30S ribosomal protein S9
141	Pthe	YP_001210907	rpsI	30S ribosomal protein S9
142	Bsub	NP_388030	rplM	50S ribosomal protein L13
142	CaPastA	YP_456778	rplM	50S ribosomal protein L13
142	CaPastO	NP_950390	rplM	50S ribosomal protein L13
142	CaPaus	YP_001799082	rplM	50S ribosomal protein L13
142	CaPmal	YP_002004365	rplM	50S ribosomal protein L13
142	Cklu	YP_001393660	rplM	50S ribosomal protein L13
142	Lpla	NP_784763	rplM	50S ribosomal protein L13
142	Maga	YP_003515644	rplM	50S ribosomal protein L13
142	Mgen	NP_073089	rplM	50S ribosomal protein L13
142	Mmob	YP_015926	rplM	50S ribosomal protein L13
142	Mmyc	NP_975690	rplM	50S ribosomal protein L13
142	Pthe	YP_001210906	rplM	50S ribosomal protein L13
143	Bsub	NP_387900	dnaX	DNA polymerase III subunits gamma and tau
143	CaPastA	YP_456313	dnaX	DNA polymerase III, gamma/tau subunit
143	CaPastO	NP_950869	dnaX	DNA polymerase III, gamma/tau subunit
143	CaPaus	YP_001799206	dnaX	DNA polymerase III, gamma/tau subunit
143	CaPmal	YP_002004085	dnaX	DNA polymerase III
143	Cklu	YP_001397176	dnaX	DNA polymerase III subunits gamma and tau
143	Lpla	NP_784458	dnaX	DNA-directed DNA polymerase III, gamma/tau subunit
143	Maga	YP_003515939	dnaX	DNA polymerase III subunit gamma and tau
143	Mgen	NP_073090	NA	DNA polymerase III subunits gamma/tau
143	Mmob	YP_015770	dnaX	DNA polymerase III subunits gamma and tau
143	Mmyc	NP_975059	dnaX	DNA polymerase III gamma-tau subunits
143	Pthe	YP_001210601	XerD	DNA polymerase III, gamma/tau subunits
144	Bsub	NP_391272	tpiA	triosephosphate isomerase
144	CaPastA	YP_456745	tpiA	triosephosphate isomerase
144	CaPastO	NP_950422	tpiA	triosephosphate isomerase
144	CaPaus	YP_001799100	tpiA	triosephosphate isomerase
144	CaPmal	YP_002004206	tpiA	triosephosphate isomerase
144	Cklu	YP_001396754	tpiA	triosephosphate isomerase
144	Lpla	NP_784536	tpiA	triosephosphate isomerase
144	Maga	YP_003515726	tpiA	triosephosphate isomerase
144	Mgen	NP_073102	tpiA	triosephosphate isomerase
144	Mmob	YP_016116	tpiA	triosephosphate isomerase
144	Mmyc	NP_975796	tpiA	triosephosphate isomerase
144	Pthe	YP_001213271	TpiA	triosephosphate isomerase
145	Bsub	NP_389532	tsf	elongation factor Ts
145	CaPastA	YP_456749	tsf	elongation factor Ts
145	CaPastO	NP_950418	tsf	elongation factor Ts
145	CaPaus	YP_001799104	tsf	elongation factor Ts
145	CaPmal	YP_002004267	tsf	elongation factor Ts
145	Cklu	YP_001394808	tsf	elongation factor Ts
145	Lpla	NP_785577	tsf	elongation factor Ts
145	Maga	YP_003515445	tsf	elongation factor Ts
145	Mgen	NP_073104	tsf	elongation factor Ts
145	Mmob	YP_015874	tsf	elongation factor Ts
145	Mmyc	NP_975587	tsf	elongation factor Ts
145	Pthe	YP_001211803	tsf	elongation factor Ts
146	Bsub	NP_389533	pyrH	uridylate kinase
146	CaPastA	YP_456748	pyrH	uridylate kinase
146	CaPastO	NP_950419	pyrH	uridylate kinase
146	CaPaus	YP_001799103	pyrH	uridylate kinase
146	CaPmal	YP_002004268	pyrH	Uridylate kinase
146	Cklu	YP_001394809	pyrH	uridylate kinase
146	Lpla	NP_785576	pyrH	uridylate kinase
146	Maga	YP_003515240	pyrH	uridylate kinase
146	Mgen	NP_073105	pyrH	uridylate kinase
146	Mmob	YP_015751	pyrH	uridylate kinase
146	Mmyc	NP_975582	pyrH	uridylate kinase
146	Pthe	YP_001211804	pyrH	uridylate kinase
147	Bsub	NP_389534	frr	ribosome recycling factor
147	CaPastA	YP_456747	frr	ribosome recycling factor
147	CaPastO	NP_950420	frr	ribosome recycling factor
147	CaPaus	YP_001799102	frr	ribosome recycling factor
147	CaPmal	YP_002004269	frr	ribosome recycling factor
147	Cklu	YP_001394810	frr	ribosome recycling factor
147	Lpla	NP_785575	frr	ribosome recycling factor
147	Maga	YP_003515241	rrf	ribosome recycling factor (ribosome releasing factor)
147	Mgen	NP_073106	frr	ribosome recycling factor
147	Mmob	YP_015752	frr	ribosome recycling factor
147	Mmyc	NP_975581	frr	ribosome recycling factor
147	Pthe	YP_001211805	frr	ribosome recycling factor
148	Bsub	NP_389487	rbgA	ribosomal biogenesis GTPase
148	CaPastA	YP_456639	NA	GTP-binding protein
148	CaPastO	NP_950530	NA	hypothetical protein
148	CaPaus	YP_001799218	NA	GTPase of unknown function
148	CaPmal	YP_002004116	NA	hypothetical protein
148	Cklu	YP_001394798	rbgA	ribosomal biogenesis GTPase
148	Lpla	NP_785403	NA	GTPase
148	Maga	YP_003515283	NA	GTP binding protein
148	Mgen	NP_073112	rbgA	ribosomal biogenesis GTPase
148	Mmob	YP_015816	rbgA	ribosomal biogenesis GTPase
148	Mmyc	NP_975415	NA	GTP-binding protein
148	Pthe	YP_001212266	NA	GTPase
149	Bsub	NP_389486	rplS	50S ribosomal protein L19
149	CaPastA	YP_456504	rplS	50S ribosomal protein L19
149	CaPastO	NP_950722	rplS	50S ribosomal protein L19
149	CaPaus	YP_001799132	rplS	50S ribosomal protein L19
149	CaPmal	YP_002004468	rplS	50S ribosomal protein L19
149	Cklu	YP_001394796	rplS	50S ribosomal protein L19
149	Lpla	NP_785230	rplS	50S ribosomal protein L19
149	Maga	YP_003515880	rplS	50S ribosomal protein L19
149	Mgen	NP_073114	rplS	50S ribosomal protein L19
149	Mmob	YP_016125	rplS	50S ribosomal protein L19
149	Mmyc	NP_975414	rplS	50S ribosomal protein L19
149	Pthe	YP_001212268	rplS	50S ribosomal protein L19
150	Bsub	NP_389485	trmD	tRNA (guanine-N(1)-)-methyltransferase
150	CaPastA	YP_456503	trmD	tRNA (guanine-N(1)-)-methyltransferase
150	CaPastO	NP_950723	trmD	tRNA (guanine-N(1)-)-methyltransferase
150	CaPaus	YP_001799133	trmD	tRNA (guanine-N(1)-)-methyltransferase
150	CaPmal	YP_002004467	trmD	tRNA (guanine-N(1)-)-methyltransferase
[truncated: 17,463 more rows]
